# Supplementary material
Source: PubMed Central journal article supplement (PMC4151734)
Supplement: 1405839111_pnas.1405839111.sapp.pdf [file 1405839111_pnas.1405839111.sapp.pdf]

## Supplementary Methods

**Patient Selection.** From January 2012 to October 2013, 69 adult patients operated on for high-grade glioma at Columbia University Medical Center (CUMC) were analyzed, including 49 primary GBM, 19 recurrent GBM and one primary anaplastic astrocytoma. All patients were enrolled under IRB protocol AAAJ-6163 or AAAA4666, as approved by the CUMC IRB committee, and all patient material was de-identified as specified by these protocols. Patients presenting for open surgical resection of lesions with the radiographic characteristics of GBM on MR imaging were considered eligible. An important inclusion criterion was the presence of FLAIR hyper-intense, non-contrast-enhancing (NE) tissue along the surgical trajectory between the planned craniotomy site and the gadolinium-enhancing border of the lesion. NE tissue outside of the planned surgical trajectory was not biopsied.

**Immunohistochemistry and Microscopy.** Formalin fixed, paraffin embedded tumor samples were sectioned at 5 microns and stained with hematoxylin and eosin (H&E). Histological analysis was performed by two board-certified neuropathologists (DP and PC). Samples were scored for the presence or absence of necrosis, microvascular proliferation, and mitotic figures. Chi-square analysis was performed to assess significant differences in the presence of these attributes between contrast enhancing (CE; n=105) and non-contrast enhancing (NE; n=86) samples (total n=191). The individual data for each sample is provided in supplementary table S5. Quantitative analysis of cell density was performed on all samples for which non-necrotic tissue filled at least one 400X field. To assess cellular density, H&E slides were scanned at low magnification for an area of highest cellular density and a representative photomicrograph was taken in this area at 400 x using an Olympus BX-43 light microscope outfitted with a DP-26 Olympus camera. The total cell count was obtained using ImageJ 1.46r software. A two-tailed Student's t-test was used to assess for a significant difference in cellularity between CE (n=87) and NE (n=80) samples (total n=167). Immunohistochemistry was performed using mouse anti-NeuN antibody (Millipore; dilution 1:1000) rabbit anti-OLIG2 (Chemicon, 1:500), mouse anti-GFAP (Chemicon, 1:1000), rat anti-CD44 (Calbiochem, 1:200), rabbit anti-IBA1 (Wako, 1:1000), rat anti-CD68 (AbD Serotec; 1:50) and mouse anti-SOX2 (Abcam; 1:5000). For the quantitative analysis in Figure 1, each slide was scanned at low magnification to select an area with the highest density of NeuN staining. A photomicrograph was taken of a representative 400x field in this area, and the total numbers of NeuN positive and negative nuclei were manually counted with the aid of the cell counter and grid macros in the ImageJ 1.46r software package. A two-tailed Student's t-test was used to assess for a significant difference in NeuN composition between CE and NE samples. We also performed a quantitative analysis of the labeling indices for OLIG2, NEUN, CD68 and SOX2 in normal (nonneoplastic) brain and non-enhancing regions of glioma samples. Each slide was scanned at low magnification to select the area with the highest density of staining for the respective marker. A representative 400x field was then manually counted by two independent observers (AD and MB) using a cell counter. Positive staining and total number of hematoxylin stained cells per field were counted and the labeling index was calculated as positive cells/total number of cells per 400x field x 100. A minimum of 100 cells per field was counted for each slide; if necessary, more than one field was counted to reach the minimum number of 100 cells. Counts from both observers were averaged for each sample and the final labeling index value was used for statistical analysis. Statistical analysis was performed using SPSS software, version 20.0 for Macintosh. A p value < 0.05 was considered statistically significant.

**RNA Extraction, Sequencing and Analysis.** We performed RNA-Seq on 92 flash frozen samples, which included 39 CE, 36 NE, and 17 NB. Only samples with an RNA Integrity Number (RIN) greater than 6 were used for RNA-seq. Genome-wide expression profiles were generated for each sample using RNA sequencing. For each sample, libraries were prepared using the Illumina TruSeq v2 RNA-Seq kit, and we obtained 15-30 million single-end, 100 base reads on an Illumina HiSeq 2000 sequencer. Raw reads from RNA-Seq experiments obtained from the Columbia Sulzberger Genome Center were mapped to the human transcriptome (hg19, Illumina iGenomes annotation) using Tophat 2(1). We used Cufflinks 2 to calculate expression levels for each gene as fragments per kilobase per million mapped reads (FPKM). For differential expression analysis, we computed read counts for reads that mapped uniquely to the transcriptome using HTSeq and used DESeq to calculate fold-changes and assess their statistical significance(2).

**Computational Deconvolution of RNA-Seq Profiles.** Our deconvolution strategy is an adaptation of the previously reported Population Specific Expression Analysis (PSEA) algorithm(3) with a few key modifications. For each sample  $i$  in our dataset, we write the expression level for a given gene  $j$  as follows:

$$G_{ij} = \sum_{k=1}^N C_{ik} g_{kj} + b \quad (1)$$

where  $N$  is the number of cell types in the sample,  $C_{ik}$  is the fractional composition of a cell type  $k$  in a sample  $i$ ,  $g_{kj}$  is the expression level of gene  $j$  in cell type  $k$ , and  $b$  is a background term that we assume is invariant across samples. Given the availability of  $M$  samples where  $M > N$  and experimental values for the fractional composition of each cell type, we can write an over-determined system of  $M$  equations like the one above and solve them to obtain  $N$  values corresponding to the expression of each gene in each cell type. Just as in PSEA, we obtain estimates of the fractional composition of each cell type using the expression data itself. The RNA expression levels of marker genes for each cell type serve as proxies for cellular composition. For example, if we re-write Equation 1 for a cell type-specific marker gene  $j^*$  that is expressed exclusively in a single cell type  $k^*$ , we obtain:

$$G_{ij^*} = \sum_{k=1}^N C_{ik^*} g_{k^*j^*} + b = C_{ik^*} g_{k^*j^*} \quad (2)$$

assuming that the background  $b=0$  for the marker gene. Hence, we can calculate the fractional composition of cell type  $k^*$  in sample  $i$  as  $C_{ik^*} = G_{ij^*} / g_{k^*j^*}$ . For simplicity of notation and because each marker gene is only expressed by a single cell type, we number the marker gene  $j$  for each cell type  $k$  as  $j=k$  and use Equation 2 to re-write Equation 1 as:

$$G_{ij} = \sum_{k=1}^N G_{ik} a_{kj} + b \quad (3)$$

where  $a_{kj} = g_{kj} / g_{kk}$  is the expression level of gene  $j$  in cell type  $k$  relative to that of the marker gene  $k$  for cell type  $k$ . We solve the corresponding system of equations subject to the constraint that  $a_{kj}$  be non-negative (a standard quadratic programming problem) using the MATLAB function *lsqnonneg*. Our approach deviates somewhat from the previously reported PSEA in two ways: 1) We attempt to estimate the absolute expression levels of each gene in each cell type  $g_{kj}$  after solving for the relative values  $a_{kj}$  and 2) We use an iterative procedure to improve our estimates of fractional

composition until reaching convergence, when the sum of  $R^2$  values differ by less than 0.000001 between iterations. For the first iteration, we seed the algorithm with cell type-specific marker genes and solve Equation 3. We then take the best-fit genes with  $R^2 > 0.9$  and calculate values for  $C_{ik}$  by taking advantage of the constraint that the sum of fractional compositions must equal one:

$$\sum_{k=1}^N C_{ik} = 1 \quad (4)$$

allowing a direct estimate of the fractional composition of each cell type. These fractional compositions are then used to solve Equation 1 in subsequent iterations across the whole transcriptome. This process of iterative improvement continues until the overall fit no longer improves. We note that genes that are undetected (zero FPKM by RNA-Seq) and genes that are entirely assigned to the background term are not given a cell type assignment. We also note that similar algorithms for deconvolving expression data while simultaneously estimating fractional composition (i.e. “complete” deconvolution) have been reported previously (4). Hence, in addition to sharing aspects of PSEA(3), our strategy is closely related to the previously reported Digital Sorting Algorithm (DSA) (5) which exploits the same basic principles and assumptions.

In our specific implementation of the above algorithm for this data set, we used several carefully selected marker genes to define six major cellular populations found in glioma tissue. We used Olig2 expression levels across our samples as a proxy for the fractional composition of OPC-like transformed and recruited cells in the tumors, while Cd44 was used for reactive and transformed astrocytes in the tumors. In addition, we used Aqp4 for Cd44<sup>-</sup> astrocytes with an unreactive phenotype, Mal and Mog for oligodendrocytes, Rbfox3 and Neurod6 for neurons, and Aif1 and Cd68 for monocytes/microglia. The expression values used as input for deconvolution and for the seed genes were in FPKM as obtained using Cufflinks 2.0 (6) Values obtained from Cufflinks 2.0 were used directly with no additional pre-processing. Importantly, in all of the resulting heat maps throughout the text, the displayed values are the fraction of total expression of a given gene that is estimated to originate from a given cell type rather than the estimated expression levels for each cell type. This is so we can display a large number of genes with a wide range of expression levels on the same scale and emphasize our main point, which is the fractional contribution of each cell type to the expression of each gene.

**Gene Ontology Analysis.** For the gene ontology lists in Table S2, we took the 500 most highly expressed genes in the deconvolved profiles of each cell type from the NE tissue that had deconvolution purities  $> 0.5$  (where more than 50% of the expression is attributed to the corresponding cell type) and assessed the enrichment of gene ontologies using FuncAssociate 2.0 (7). FuncAssociate uses Fisher’s exact test to calculate a p-value for enrichment. For the gene ontology analysis shown in Fig 5., we used iPAGE, a mutual information-based algorithm for assessing gene ontology enrichment (8), to associate pathways with differentially expressed genes in the NE and normal (nonneoplastic) brain (NB) samples. Following differential expression analysis between the NE regions for each subtype and normal brain (NB), we took the adjusted p-values ( $p_{adj}$ ) calculated using DESeq and used them to calculate  $v = \pm(1 - p_{adj})$ . If a gene is more highly expressed in the NE samples than NB samples,  $v > 0$ . For each differential expression analysis, we ran iPAGE on the v-values separated into 20 bins and assessed the significance of association between each gene ontology and bin.

## Supplementary References

1. Kim D, *et al.* (2013) TopHat2: accurate alignment of transcriptomes in the presence of insertions, deletions and gene fusions. *Genome Biol.* 14(4).
2. Anders S & Huber W (2010) Differential expression analysis for sequence count data. *Genome Biol* 11(10):R106.
3. Kuhn A, Thu D, Waldvogel HJ, Faull RLM, & Luthi-Carter R (2011) Population-specific expression analysis (PSEA) reveals molecular changes in diseased brain. *nature methods* 8(11):945-947.
4. Gaujoux R & Seoighe C (2013) CellMix: a comprehensive toolbox for gene expression deconvolution. *Bioinformatics* 29(17):2211-2212.
5. Zhong Y, Wan YW, Pang K, Chow LM, & Liu Z (2013) Digital sorting of complex tissues for cell type-specific gene expression profiles. *BMC bioinformatics* 14:89.
6. Trapnell C, *et al.* (2013) Differential analysis of gene regulation at transcript resolution with RNA-seq. *Nature biotechnology* 31(1):46-53.
7. Berriz GF, Beaver JE, Cenik C, Tasan M, & Roth FP (2009) Next generation software for functional trend analysis. *Bioinformatics* 25(22):3043-3044.
8. Goodarzi H, Elemento O, & Tavazoie S (2009) Revealing global regulatory perturbations across human cancers. *Molecular cell* 36(5):900-911.

## Supplementary Figures

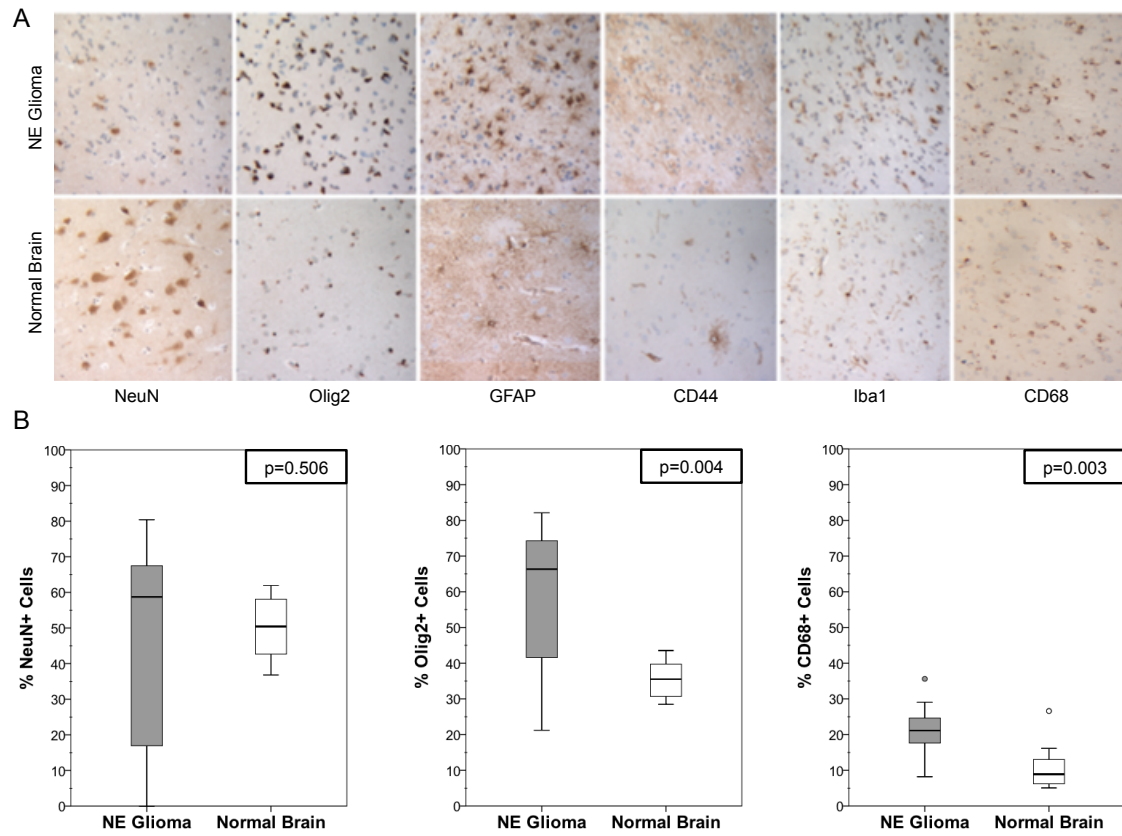

**Fig S1.** A) Immunohistochemical stains for cell type-specific markers show marked differences in the cellular composition of NE region of glioma samples compared to normal (nonneoplastic) brain. B) Quantitative analysis of Olig2 and CD68, but not NeuN, shows statistically significant differences in labeling index between NE regions and normal brain. A non-parametric Mann-Whitney U test was used to calculate p-values.

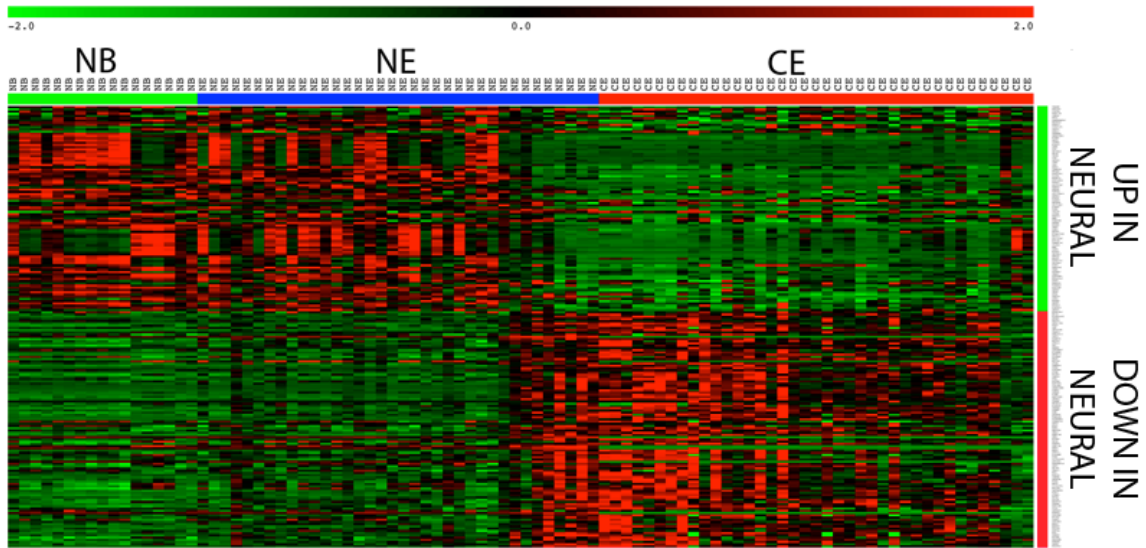

**Fig. S2.** Tissue samples from normal (nonneoplastic) brain (NB), non-enhancing regions of GBM (NE), and contrast-enhancing regions of GBM (CE) differ in the expression of Neural genes. NB and NE samples express higher levels of genes that are up in Neural GBM, and the CE samples express higher levels of genes that are down in Neural GBM.

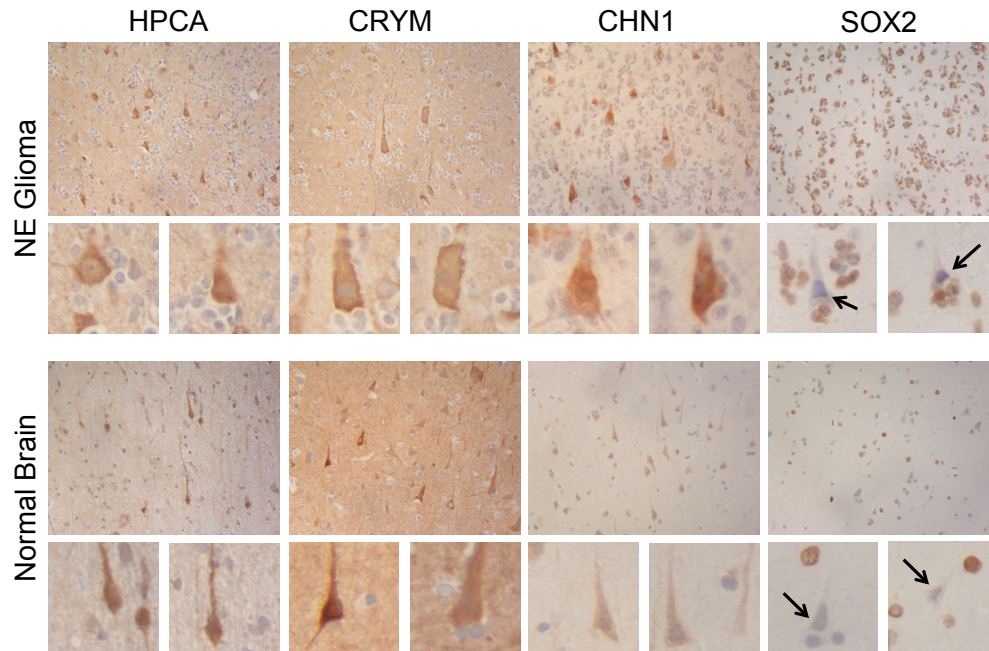

**Fig S3.** Immunohistochemical staining with HPCA, CRYM and CHN1 shows specific distribution within pyramidal neurons in both NE regions of GBM and in normal (nonneoplastic) brain samples. Comparable regions of the same sample are shown. HPCA, CRYM and CHN1 are Verhaak Neural Subtype classifier genes and are predicted by our computational algorithm to be highly selectively expressed in neurons, with cell-type purities of 96%, 94% and 92% respectively (Table S4). In contrast, SOX2 staining of the same NE glioma samples (upper panels) labels numerous infiltrating glioma cells, but not entrapped neurons (indicated with black arrows). Scattered SOX2+ cells are also seen in the normal brain samples (lower panels). The following antibodies were used: rabbit anti-HPCA (Abcam; 1:1000); mouse anti-CRYM (LifeSpan Biosciences; 1:1000); rabbit anti-CHN1 (Novus Biologicals; 1:500), mouse anti-SOX2 (Abcam; 1:5000).

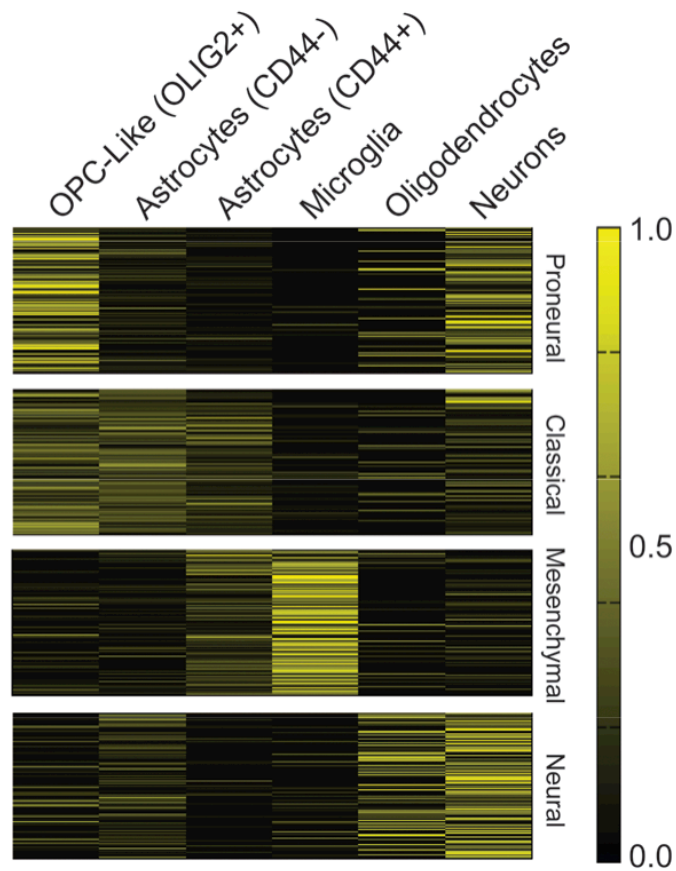

**Fig S4.** Heatmap showing the cell type-specific expression of Verhaak Classifier Genes derived from the deconvolution of the NE and NB samples. OPCs express the highest levels of Proneural genes. Classical genes are expressed by both astrocytes (CD44- and CD44+) as well as OPCs. Microglia, and to a lesser extent CD44+ astrocytes, express the highest levels of Mesenchymal genes. The expression of Neural genes are highest in neurons and oligodendrocytes. The list of Classifier genes and associated cell type-specific expression profiles are provided in Supplementary Table S4.



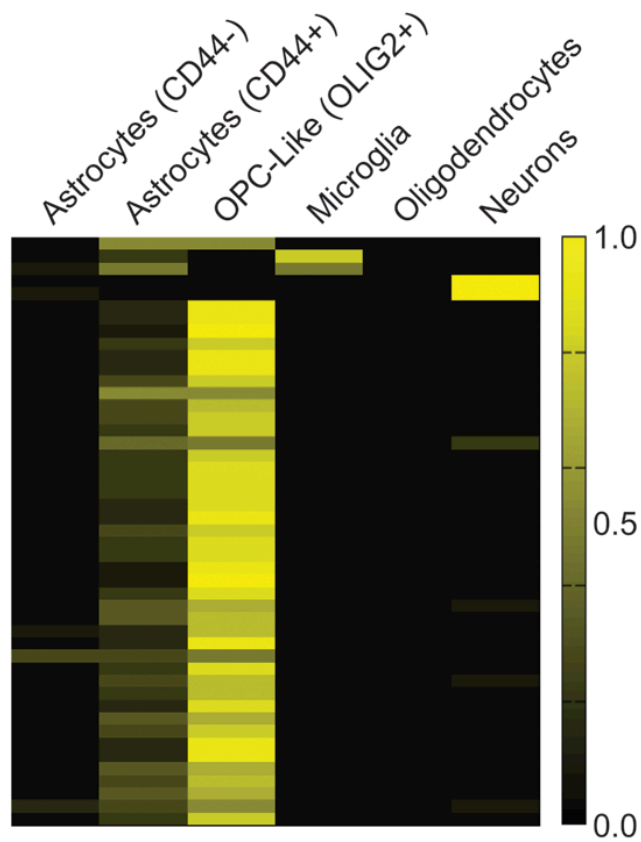

**Fig. S5.** OPC-like (OLIG2+) cells and CD44+ astrocytes are enriched in proliferation genes. These genes are derived from the iPAGE gene ontology (DNA-replication and M-phase and mitotic cell cycle). The heat map shows how the expression of these proliferation genes is distributed across different cell types, as determined by deconvolution of the NB and NE glioma samples.

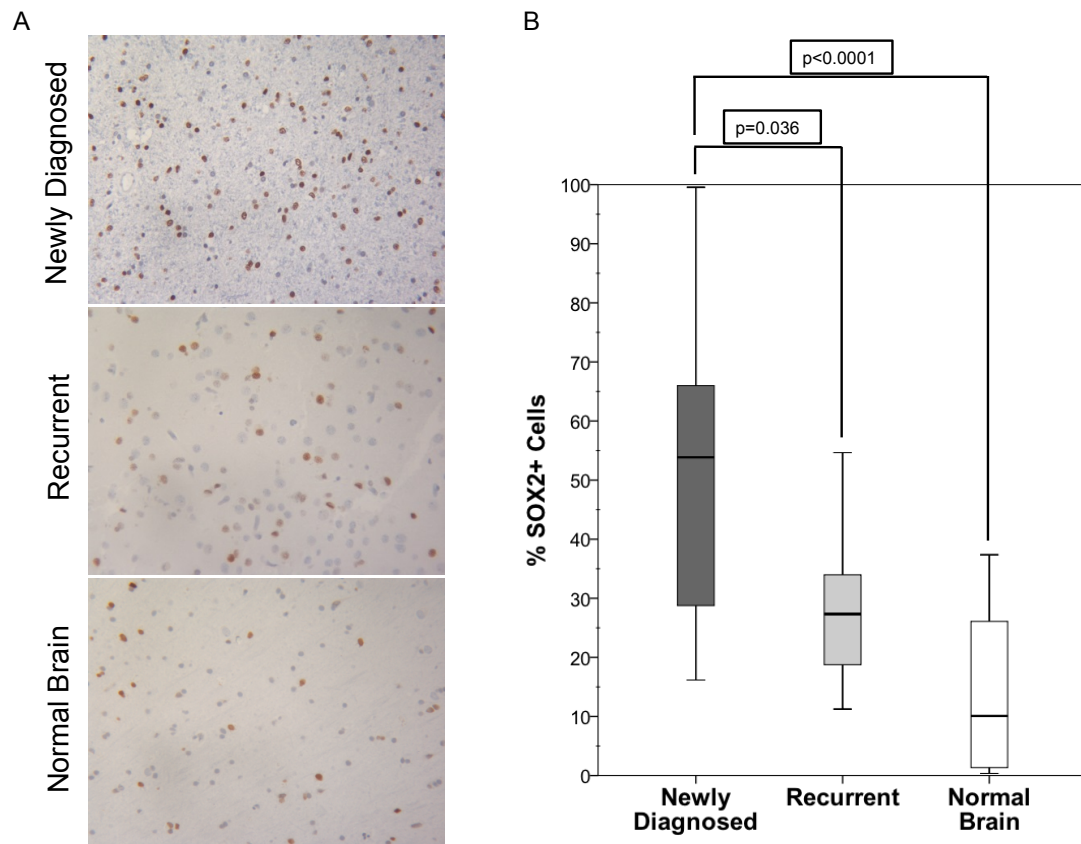

**Fig. S6.** A) Representative images of SOX2 immunohistochemical staining in the NE regions of newly diagnosed GBM, recurrent GBM and in normal (nonneoplastic) brain samples. B) SOX2 labeling indices are significantly different in NE regions of newly diagnosed GBM compared to equivalent areas in recurrent GBM specimens. SOX2 levels are not significantly different between NE regions of recurrent GBM and normal brain ( $p=0.190$ ). For multiple comparisons, a one-way ANOVA with a Tamhane's T2 post-hoc test (equal variances not assumed) was used to calculate p-values. These findings are consistent with RNA-Seq differential expression analysis, which showed FDR-corrected p-values for Sox2 in newly diagnosed GBM vs. normal (nonneoplastic) brain of  $1 \times 10^{-12}$  and for newly diagnosed GBM vs. recurrent GBM of  $1 \times 10^{-8}$ .

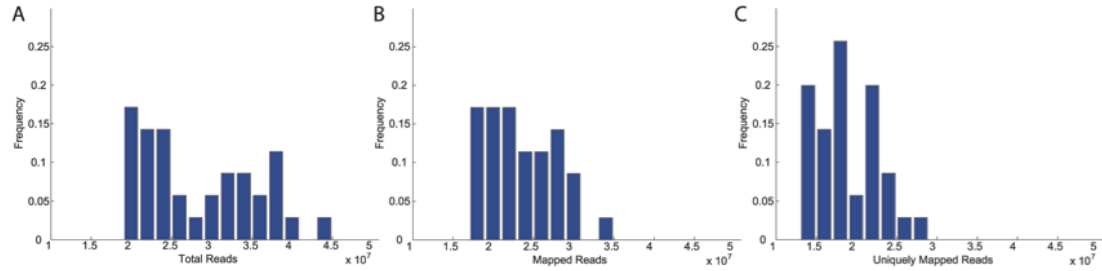

**Fig. S7.** Histograms showing A) the distribution of total reads, B) the distribution of mapped reads, and C) the distribution of reads uniquely mapped to the human transcriptome across all NE and NB samples included in this study. The medians for these three distributions are 26.9M (total reads), 22.6M (mapped reads), and 18.1M (uniquely mapped reads), respectively. The median fraction of reads that aligned was 80% (range 75%-92%) and the median fraction of mapped reads that aligned uniquely to the transcriptome was 80% (range 76%-83%).

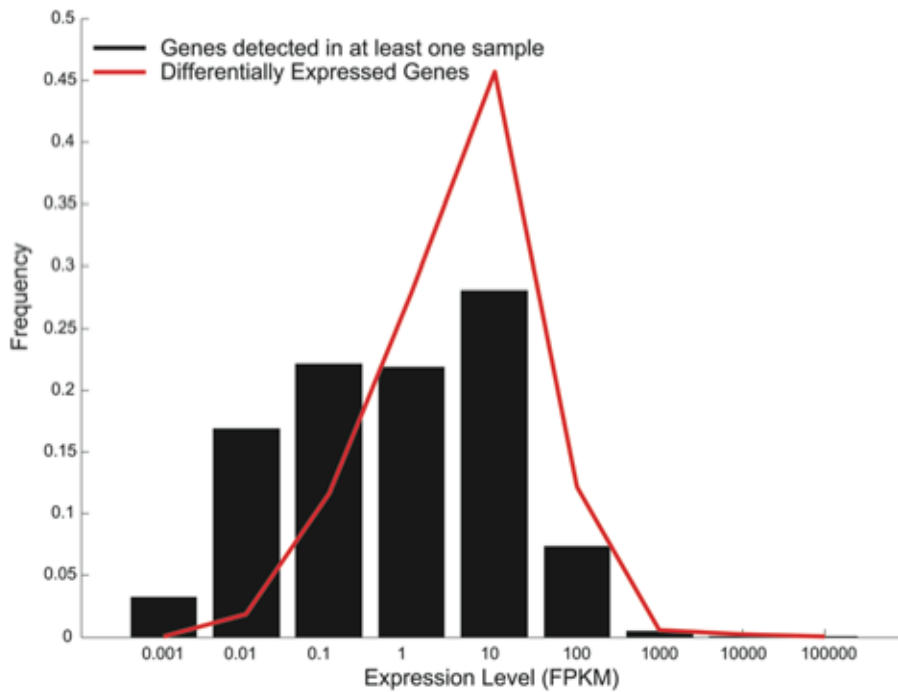

**Fig. S8.** Histograms showing the RNA abundance distributions for all genes detected in at least one nonneoplastic brain (NB) sample or NE sample from a Proneural GBM (black bars) and for genes that were found to be differentially expressed between these two sample sets (adjusted p-value < 0.05). Although the average expression level of the differentially expressed genes is higher than that of the whole transcriptome (50 FPKM vs. 21 FPKM), we can detect differential expression across a broad range of expression levels.

| Age | Sex | Location                     | Primary or Recurrent | Adjuvant Therapy | EGFR Amplification | EGFRvIII | IDH1R132 Mutation | Subtype of CE Biopsy | Subtype of NE Biopsy |
|-----|-----|------------------------------|----------------------|------------------|--------------------|----------|-------------------|----------------------|----------------------|
| 58  | F   | Left Temporal                | Primary              | N/A              | Negative           | Negative | Negative          | P                    | N                    |
| 76  | M   | Left Temporal                | Primary              | N/A              | Negative           | NT       | Negative          | P                    | N                    |
| 65  | M   | Left Frontal                 | Primary              | None             | Negative           | Negative | Positive          | P                    | P                    |
| 78  | M   | Left Frontal                 | Primary              | N/A              | Negative           | Negative | Negative          | P                    | P                    |
| 59  | F   | Right Temporal               | Primary              | N/A              | Negative           | Negative | Negative          | P                    | P                    |
| 69  | M   | Left Parietal                | Primary              | N/A              | Negative           | Negative | Negative          | P                    | P                    |
| 38  | F   | Corpus Callosum              | Primary              | N/A              | Negative           | Negative | Negative          | P                    | P                    |
| 65  | M   | Left Occipital               | Primary              | N/A              | Negative           | Negative | Negative          | C                    | N                    |
| 64  | M   | Right Parietal               | Primary              | N/A              | Positive           | Positive | Negative          | C                    | N                    |
| 68  | F   | Left Temporal                | Primary              | N/A              | Positive           | Negative | Negative          | C                    | N                    |
| 57  | M   | Left Temporal                | Primary              | N/A              | Positive           | Negative | Negative          | C                    | M                    |
| 57  | F   | Left Frontal                 | Primary              | N/A              | Positive           | Positive | Negative          | C                    | C                    |
| 56  | F   | Right Temporal               | Primary              | N/A              | Negative           | Negative | Negative          | M                    | P                    |
| 69  | F   | Left Frontal                 | Primary              | N/A              | Negative           | Negative | Negative          | M                    | N                    |
| 68  | M   | Left Parietal                | Primary              | N/A              | Positive           | Positive | Negative          | M                    | N                    |
| 56  | F   | Splenium/ Bilateral Parietal | Primary              | N/A              | Negative           | Negative | Negative          | NS                   | N                    |
| 60  | F   | Left Temporal                | Primary              | N/A              | Negative           | Negative | Negative          | NS                   | N                    |
| 81  | M   | Left Temporal                | Primary              | N/A              | Negative           | Negative | Negative          | NS                   | N                    |
| 63  | M   | Right Temporal               | Recurrent            | Tmz, Rad         | Positive           | Negative | Negative          | C                    | NS                   |
| 57  | F   | Right Frontal                | Recurrent            | Tmz, Rad, Bev    | Positive           | Positive | Negative          | C                    | NS                   |
| 67  | F   | Right Temporal               | Recurrent            | Tmz, Rad         | NT                 | Negative | NT                | M                    | M                    |
| 54  | M   | Left Temporal                | Recurrent            | Tmz, Rad, Vac    | Negative           | Negative | Negative          | M                    | N                    |
| 75  | M   | Left Temporal                | Recurrent            | Tmz, Rad         | NT                 | Negative | NT                | M                    | N                    |
| 53  | M   | Left Parietal                | Recurrent            | Tmz, Rad         | NT                 | Negative | Negative          | M                    | N                    |
| 57  | M   | Right Temporal               | Recurrent            | Tmz, Rad         | Negative           | Negative | Negative          | M                    | N                    |
| 53  | M   | Right Temporal               | Recurrent            | Tmz, Rad         | Negative           | Negative | Negative          | N                    | N                    |
| 44  | M   | Right Temporal               | Recurrent            | Tmz, Rad         | Negative           | Negative | Negative          | N                    | N                    |

**Table S1.** We performed RNA-Seq analysis on 75 glioma samples from 27 different glioma patients. These included 39 samples from the CE regions and 36 samples from the NE regions. NS=not sequenced. 9 patients had previous surgery for GBM and had received adjuvant therapy; Tmz-Temozolomide, Rad=Radiation, Bev=Bevacizumab, Vac=Vaccine therapy. Each sample was classified according to the Spearman correlation with the subtyped TCGA profiles from Verhaak et al., (2010).

| Cell Type         | N   | X    | LOD         | P        | P_adj  | Attribute ID | Attribute Name                     |
|-------------------|-----|------|-------------|----------|--------|--------------|------------------------------------|
| OPC-like (olig2+) | 80  | 196  | 1.442883392 | 5.97E-72 | <0.001 | GO:0005840   | ribosome                           |
| OPC-like (olig2+) | 111 | 477  | 1.113389768 | 2.96E-70 | <0.001 | GO:0006412   | translation                        |
| OPC-like (olig2+) | 62  | 334  | 0.941689266 | 9.75E-33 | <0.001 | GO:0008380   | RNA splicing                       |
| OPC-like (olig2+) | 44  | 580  | 0.475581402 | 3.96E-09 | <0.001 | GO:0006325   | chromatin organization             |
| OPC-like (olig2+) | 69  | 1452 | 0.259302529 | 1.89E-05 | 0.038  | GO:0007049   | cell cycle                         |
|                   |     |      |             |          |        |              |                                    |
| Astrocyte (CD44-) | 132 | 3111 | 0.228057632 | 7.62E-07 | 0.002  | GO:0044710   | single-organism metabolic process  |
| Astrocyte (CD44-) | 113 | 2585 | 0.235449773 | 1.54E-06 | 0.002  | GO:0044281   | small molecule metabolic process   |
| Astrocyte (CD44-) | 59  | 1135 | 0.29931064  | 5.93E-06 | 0.018  | GO:0005215   | transporter activity               |
| Astrocyte (CD44-) | 48  | 880  | 0.318086198 | 1.37E-05 | 0.041  | GO:0022857   | transmembrane transporter activity |
|                   |     |      |             |          |        |              |                                    |
| Astrocyte (CD44+) | 17  | 72   | 1.043095319 | 1.38E-11 | <0.001 | GO:0006956   | complement activation              |
| Astrocyte (CD44+) | 17  | 92   | 0.908928106 | 8.48E-10 | <0.001 | GO:0072376   | protein activation cascade         |
| Astrocyte (CD44+) | 72  | 1284 | 0.342716095 | 2.52E-08 | <0.001 | GO:0006955   | immune response                    |
| Astrocyte (CD44+) | 69  | 1373 | 0.2870306   | 2.89E-06 | 0.007  | GO:0006952   | defense response                   |
| Astrocyte (CD44+) | 95  | 2164 | 0.229901351 | 1.11E-05 | 0.034  | GO:0005576   | extracellular region               |
|                   |     |      |             |          |        |              |                                    |
| Microglia         | 158 | 1284 | 0.81400913  | 5.83E-60 | <0.001 | GO:0006955   | immune response                    |
| Microglia         | 78  | 510  | 0.852025365 | 5.59E-35 | <0.001 | GO:0006954   | inflammatory response              |
| Microglia         | 59  | 388  | 0.833392802 | 2.30E-26 | <0.001 | GO:0031012   | extracellular matrix               |
| Microglia         | 87  | 867  | 0.642902457 | 2.87E-25 | <0.001 | GO:0016477   | cell migration                     |
| Microglia         | 67  | 610  | 0.673162205 | 1.26E-21 | <0.001 | GO:0006935   | chemotaxis                         |
|                   |     |      |             |          |        |              |                                    |
| Oligodendrocyte   | 23  | 90   | 1.091229572 | 5.04E-16 | <0.001 | GO:0008366   | axon ensheathment                  |
| Oligodendrocyte   | 22  | 87   | 1.084549462 | 2.80E-15 | <0.001 | GO:0042552   | myelination                        |
| Oligodendrocyte   | 29  | 254  | 0.667558471 | 2.32E-10 | <0.001 | GO:0030424   | axon                               |
| Oligodendrocyte   | 44  | 566  | 0.487434233 | 1.88E-09 | <0.001 | GO:0008610   | lipid biosynthetic process         |
| Oligodendrocyte   | 53  | 809  | 0.409137222 | 1.57E-08 | <0.001 | GO:0007010   | cytoskeleton organization          |
| Oligodendrocyte   | 30  | 435  | 0.423425548 | 8.66E-06 | 0.023  | GO:0030695   | GTPase regulator activity          |
|                   |     |      |             |          |        |              |                                    |
| Neuron            | 100 | 664  | 0.863391753 | 1.70E-44 | <0.001 | GO:0007268   | synaptic transmission              |
| Neuron            | 96  | 633  | 0.863435821 | 6.39E-43 | <0.001 | GO:0043005   | neuron projection                  |
| Neuron            | 41  | 254  | 0.851040175 | 1.47E-19 | <0.001 | GO:0030424   | axon                               |
| Neuron            | 38  | 307  | 0.713013509 | 2.60E-14 | <0.001 | GO:0030425   | dendrite                           |
| Neuron            | 75  | 1099 | 0.441690746 | 1.47E-12 | <0.001 | GO:0006811   | ion transport                      |
| Neuron            | 33  | 271  | 0.701802584 | 2.18E-12 | <0.001 | GO:0043025   | neuronal cell body                 |

**Table S2.** Gene ontologies for cell type-specific genes in NE regions of GBM. We took the top 500+ genes that showed purity of greater than 0.5 (ranked by FPKM levels distributed to the corresponding cell) and performed gene ontology analysis using FuncAssociate 2.0. Selected ontologies are shown. N= number of cell type-specific genes having the attribute, X= total number of genes having the attribute, LOD=logarithm (base 10) of the odds ratio, P= p-value, P adj= resampling adjusted p-value.

| Classifier Genes | Cell Type | OPC-like (OLIG2+) | Astrocyte (CD44-) | Astrocyte (CD44+) | Microglia | Oligodendrocyte | Neuron |
|------------------|-----------|-------------------|-------------------|-------------------|-----------|-----------------|--------|
| PDGFRA           | OPC       | 0.90              | 0.00              | 0.10              | 0.00      | 0.00            | 0.00   |
| RLBP1            | OPC       | 0.26              | 0.45              | 0.00              | 0.01      | 0.00            | 0.27   |
| LNX1             | OPC       | 0.49              | 0.00              | 0.08              | 0.00      | 0.00            | 0.43   |
| CSPG4            | OPC       | 0.91              | 0.00              | 0.09              | 0.00      | 0.00            | 0.00   |
| CDO1             | OPC       | 0.00              | 0.17              | 0.55              | 0.00      | 0.00            | 0.28   |
| NXPH1            | OPC       | 0.60              | 0.03              | 0.10              | 0.00      | 0.00            | 0.27   |
| OLFM2            | OPC       | 0.29              | 0.26              | 0.09              | 0.00      | 0.00            | 0.35   |
| CHRNA4           | OPC       | 0.33              | 0.00              | 0.00              | 0.00      | 0.00            | 0.67   |
| TACC2            | OPC       | 0.63              | 0.00              | 0.00              | 0.00      | 0.00            | 0.37   |
| RNF180           | OPC       | 0.35              | 0.28              | 0.24              | 0.00      | 0.00            | 0.14   |
| THSD7B           | OPC       | 0.00              | 0.00              | 0.00              | 0.34      | 0.00            | 0.66   |
| PTPRZ1           | OPC       | 0.66              | 0.00              | 0.34              | 0.00      | 0.00            | 0.00   |
| CSPG5            | OPC       | 0.68              | 0.15              | 0.02              | 0.00      | 0.00            | 0.15   |
| MATN4            | OPC       | 0.87              | 0.00              | 0.11              | 0.00      | 0.00            | 0.02   |
| SLITRK1          | OPC       | 0.05              | 0.00              | 0.00              | 0.00      | 0.40            | 0.55   |
| SPON1            | OPC       | 0.20              | 0.51              | 0.00              | 0.00      | 0.00            | 0.29   |
| MAP3K1           | OPC       | 0.92              | 0.00              | 0.08              | 0.00      | 0.00            | 0.00   |
| TMEM100          | OPC       | 0.89              | 0.00              | 0.10              | 0.00      | 0.00            | 0.01   |
| PCDH20           | OPC       | 0.00              | 0.01              | 0.06              | 0.19      | 0.00            | 0.75   |
| F2R              | OPC       | 0.66              | 0.00              | 0.34              | 0.00      | 0.00            | 0.00   |
| CHST11           | OPC       | 0.79              | 0.00              | 0.14              | 0.00      | 0.00            | 0.07   |
| OPRL1            | OPC       | 0.00              | 0.13              | 0.01              | 0.02      | 0.00            | 0.84   |
| EMID1            | OPC       | 0.11              | 0.51              | 0.00              | 0.17      | 0.00            | 0.21   |
| LRRTM3           | OPC       | 0.35              | 0.10              | 0.05              | 0.00      | 0.00            | 0.50   |
| ETV5             | OPC       | 0.52              | 0.00              | 0.14              | 0.03      | 0.00            | 0.31   |
| COL11A1          | OPC       | 0.25              | 0.00              | 0.17              | 0.34      | 0.00            | 0.23   |
| SLC35F1          | OPC       | 0.41              | 0.00              | 0.13              | 0.00      | 0.00            | 0.45   |
| DPYSL3           | OPC       | 0.44              | 0.30              | 0.26              | 0.00      | 0.00            | 0.00   |
| FSTL5            | OPC       | 0.00              | 0.14              | 0.00              | 0.00      | 0.03            | 0.84   |
| GFRA2            | OPC       | 0.00              | 0.04              | 0.11              | 0.00      | 0.00            | 0.85   |
| RRM2             | OPC       | 0.74              | 0.00              | 0.26              | 0.00      | 0.00            | 0.00   |
| CACNG4           | OPC       | 0.92              | 0.00              | 0.08              | 0.00      | 0.00            | 0.00   |
| SLC7A3           | OPC       | 0.00              | 0.82              | 0.00              | 0.18      | 0.00            | 0.00   |
| HES5             | OPC       | 0.69              | 0.18              | 0.00              | 0.00      | 0.00            | 0.13   |
| NETO1            | OPC       | 0.36              | 0.00              | 0.00              | 0.00      | 0.00            | 0.64   |
| KCND3            | OPC       | 0.00              | 0.20              | 0.14              | 0.00      | 0.00            | 0.66   |
| KCND2            | OPC       | 0.74              | 0.00              | 0.00              | 0.00      | 0.00            | 0.26   |
| DDAH1            | OPC       | 0.08              | 0.45              | 0.00              | 0.00      | 0.00            | 0.47   |
| CNTN6            | OPC       | 0.13              | 0.05              | 0.00              | 0.05      | 0.00            | 0.77   |
| CALCRL           | OPC       | 0.60              | 0.28              | 0.12              | 0.00      | 0.00            | 0.00   |
| LPHN3            | OPC       | 0.43              | 0.13              | 0.11              | 0.00      | 0.00            | 0.33   |
| SOX11            | OPC       | 0.91              | 0.00              | 0.09              | 0.00      | 0.00            | 0.00   |
| RPRM             | OPC       | 0.53              | 0.14              | 0.00              | 0.00      | 0.00            | 0.33   |
| ZBED4            | OPC       | 0.77              | 0.00              | 0.11              | 0.00      | 0.00            | 0.12   |
| LRP1             | OPC       | 0.28              | 0.22              | 0.17              | 0.14      | 0.00            | 0.20   |
| PRKG2            | OPC       | 0.14              | 0.00              | 0.12              | 0.00      | 0.00            | 0.74   |
| PTGFRN           | OPC       | 0.50              | 0.10              | 0.25              | 0.01      | 0.00            | 0.14   |
| INHBB            | OPC       | 0.26              | 0.13              | 0.44              | 0.00      | 0.00            | 0.17   |
| KLF12            | OPC       | 0.54              | 0.02              | 0.07              | 0.00      | 0.00            | 0.36   |
| GRIA3            | OPC       | 0.23              | 0.22              | 0.04              | 0.00      | 0.00            | 0.50   |
| PDZRN4           | OPC       | 0.20              | 0.32              | 0.00              | 0.00      | 0.00            | 0.48   |
| ZFP36L1          | OPC       | 0.22              | 0.00              | 0.39              | 0.39      | 0.00            | 0.00   |
| ENC1             | OPC       | 0.00              | 0.19              | 0.01              | 0.00      | 0.00            | 0.80   |
| PRRX1            | OPC       | 0.08              | 0.09              | 0.53              | 0.26      | 0.00            | 0.03   |
| SDC3             | OPC       | 0.57              | 0.20              | 0.15              | 0.00      | 0.00            | 0.09   |
| NTN1             | OPC       | 0.62              | 0.04              | 0.32              | 0.02      | 0.00            | 0.00   |
| CNTN4            | OPC       | 0.00              | 0.12              | 0.00              | 0.00      | 0.00            | 0.88   |
| LHFPL3           | OPC       | 0.85              | 0.00              | 0.15              | 0.00      | 0.00            | 0.00   |
| ZEB1             | OPC       | 0.80              | 0.00              | 0.06              | 0.00      | 0.00            | 0.13   |
| MEGF11           | OPC       | 0.80              | 0.00              | 0.07              | 0.00      | 0.00            | 0.12   |
| FNBP1L           | OPC       | 0.31              | 0.28              | 0.19              | 0.00      | 0.00            | 0.23   |

|           |           |      |      |      |      |      |      |
|-----------|-----------|------|------|------|------|------|------|
| DPP10     | OPC       | 0.00 | 0.14 | 0.00 | 0.00 | 0.11 | 0.75 |
| CPNE8     | OPC       | 0.13 | 0.28 | 0.00 | 0.08 | 0.00 | 0.51 |
| LRRFIP1   | OPC       | 0.12 | 0.10 | 0.29 | 0.00 | 0.00 | 0.50 |
| ADCYAP1R1 | OPC       | 0.09 | 0.55 | 0.19 | 0.00 | 0.00 | 0.17 |
| LRRTM4    | OPC       | 0.21 | 0.00 | 0.10 | 0.00 | 0.00 | 0.69 |
| TRIB2     | OPC       | 0.91 | 0.00 | 0.05 | 0.00 | 0.00 | 0.04 |
| SPSB4     | OPC       | 0.96 | 0.00 | 0.04 | 0.00 | 0.00 | 0.00 |
| FUT9      | OPC       | 0.48 | 0.05 | 0.00 | 0.00 | 0.00 | 0.47 |
| SPRED2    | OPC       | 0.41 | 0.04 | 0.14 | 0.01 | 0.00 | 0.40 |
| CDK6      | OPC       | 0.64 | 0.21 | 0.13 | 0.02 | 0.00 | 0.00 |
| FXYD6     | OPC       | 0.42 | 0.17 | 0.05 | 0.00 | 0.00 | 0.36 |
| MYT1      | OPC       | 1.00 | 0.00 | 0.00 | 0.00 | 0.00 | 0.00 |
| GPRASP1   | OPC       | 0.00 | 0.08 | 0.00 | 0.00 | 0.00 | 0.92 |
| GABRG1    | OPC       | 0.00 | 0.26 | 0.00 | 0.00 | 0.21 | 0.53 |
| OLFM3     | OPC       | 0.00 | 0.07 | 0.00 | 0.00 | 0.00 | 0.93 |
| RUNX1T1   | OPC       | 0.00 | 0.19 | 0.03 | 0.00 | 0.00 | 0.78 |
| RESP18    | OPC       | 0.00 | 0.27 | 0.07 | 0.00 | 0.00 | 0.66 |
| GFAP      | astrocyte | 0.00 | 0.53 | 0.04 | 0.31 | 0.12 | 0.00 |
| AQP4      | astrocyte | 0.00 | 1.00 | 0.00 | 0.00 | 0.00 | 0.00 |
| PLA2G7    | astrocyte | 0.00 | 0.37 | 0.00 | 0.48 | 0.14 | 0.01 |
| SLC39A12  | astrocyte | 0.00 | 0.61 | 0.00 | 0.03 | 0.03 | 0.32 |
| MLC1      | astrocyte | 0.17 | 0.60 | 0.07 | 0.00 | 0.00 | 0.16 |
| DIO2      | astrocyte | 0.00 | 0.28 | 0.00 | 0.00 | 0.00 | 0.72 |
| SLC14A1   | astrocyte | 0.00 | 0.47 | 0.12 | 0.00 | 0.35 | 0.06 |
| ALDH1L1   | astrocyte | 0.00 | 0.85 | 0.00 | 0.00 | 0.00 | 0.15 |
| ALDOC     | astrocyte | 0.28 | 0.27 | 0.00 | 0.00 | 0.00 | 0.45 |
| TTPA      | astrocyte | 0.00 | 0.58 | 0.02 | 0.00 | 0.00 | 0.40 |
| ACSBG1    | astrocyte | 0.01 | 0.64 | 0.00 | 0.00 | 0.10 | 0.25 |
| CHRD1     | astrocyte | 0.35 | 0.08 | 0.00 | 0.00 | 0.00 | 0.57 |
| SLC4A4    | astrocyte | 0.11 | 0.55 | 0.03 | 0.00 | 0.00 | 0.30 |
| SLC1A2    | astrocyte | 0.00 | 0.22 | 0.00 | 0.00 | 0.00 | 0.78 |
| SLC25A18  | astrocyte | 0.00 | 0.65 | 0.00 | 0.00 | 0.00 | 0.35 |
| SLC1A3    | astrocyte | 0.00 | 0.60 | 0.11 | 0.00 | 0.00 | 0.29 |
| F3        | astrocyte | 0.06 | 0.41 | 0.16 | 0.22 | 0.00 | 0.15 |
| PPP1R3G   | astrocyte | 0.00 | 0.60 | 0.00 | 0.00 | 0.00 | 0.39 |
| FZD2      | astrocyte | 0.12 | 0.41 | 0.09 | 0.36 | 0.00 | 0.02 |
| MERTK     | astrocyte | 0.00 | 0.30 | 0.00 | 0.57 | 0.00 | 0.13 |
| GJB6      | astrocyte | 0.00 | 0.05 | 0.00 | 0.00 | 0.00 | 0.95 |
| HAPLN1    | astrocyte | 0.20 | 0.29 | 0.24 | 0.00 | 0.00 | 0.28 |
| RFX4      | astrocyte | 0.20 | 0.59 | 0.21 | 0.00 | 0.00 | 0.00 |
| PAPSS2    | astrocyte | 0.25 | 0.00 | 0.02 | 0.55 | 0.00 | 0.19 |
| SLC15A2   | astrocyte | 0.02 | 0.68 | 0.03 | 0.00 | 0.00 | 0.27 |
| PPP1R3C   | astrocyte | 0.00 | 0.17 | 0.00 | 0.00 | 0.00 | 0.83 |
| TLR3      | astrocyte | 0.00 | 0.36 | 0.22 | 0.40 | 0.00 | 0.02 |
| ACOT11    | astrocyte | 0.00 | 0.51 | 0.07 | 0.02 | 0.00 | 0.40 |
| ATP1A2    | astrocyte | 0.00 | 0.51 | 0.00 | 0.00 | 0.07 | 0.42 |
| BMPR1B    | astrocyte | 0.00 | 0.68 | 0.11 | 0.00 | 0.00 | 0.21 |
| PRODH     | astrocyte | 0.00 | 0.62 | 0.00 | 0.00 | 0.00 | 0.38 |
| GLI3      | astrocyte | 0.08 | 0.28 | 0.43 | 0.00 | 0.00 | 0.20 |
| TMEM47    | astrocyte | 0.00 | 0.64 | 0.06 | 0.00 | 0.00 | 0.30 |
| SLC9A3R1  | astrocyte | 0.11 | 0.49 | 0.06 | 0.00 | 0.22 | 0.13 |
| CTH       | astrocyte | 0.31 | 0.25 | 0.15 | 0.00 | 0.00 | 0.29 |
| NTSR2     | astrocyte | 0.00 | 0.40 | 0.00 | 0.00 | 0.27 | 0.34 |
| SLC7A10   | astrocyte | 0.00 | 0.14 | 0.00 | 0.00 | 0.00 | 0.86 |
| VCAM1     | astrocyte | 0.00 | 0.00 | 0.80 | 0.20 | 0.00 | 0.00 |
| FGFR3     | astrocyte | 0.00 | 0.56 | 0.00 | 0.00 | 0.01 | 0.43 |
| CCDC80    | astrocyte | 0.01 | 0.42 | 0.10 | 0.47 | 0.00 | 0.00 |
| ENTPD2    | astrocyte | 0.00 | 0.49 | 0.23 | 0.00 | 0.18 | 0.10 |
| CYBRD1    | astrocyte | 0.00 | 0.18 | 0.15 | 0.33 | 0.16 | 0.18 |
| KCNE1L    | astrocyte | 1.00 | 0.00 | 0.00 | 0.00 | 0.00 | 0.00 |
| TNC       | astrocyte | 0.28 | 0.00 | 0.46 | 0.26 | 0.00 | 0.00 |
| TLCD1     | astrocyte | 0.71 | 0.00 | 0.10 | 0.00 | 0.00 | 0.19 |
| PBXIP1    | astrocyte | 0.00 | 0.67 | 0.06 | 0.04 | 0.04 | 0.18 |



|          |                     |      |      |      |      |      |      |
|----------|---------------------|------|------|------|------|------|------|
| GRIN2C   | astrocyte           | 0.00 | 0.40 | 0.00 | 0.00 | 0.10 | 0.50 |
| ADHFE1   | astrocyte           | 0.19 | 0.32 | 0.00 | 0.00 | 0.23 | 0.26 |
| AGT      | astrocyte           | 0.17 | 0.80 | 0.00 | 0.00 | 0.00 | 0.03 |
| GLDC     | astrocyte           | 0.60 | 0.13 | 0.17 | 0.00 | 0.00 | 0.10 |
| SLC7A2   | astrocyte           | 0.00 | 0.67 | 0.01 | 0.05 | 0.13 | 0.14 |
| GJA1     | astrocyte           | 0.00 | 0.68 | 0.00 | 0.08 | 0.08 | 0.16 |
| PDK4     | astrocyte           | 0.01 | 0.01 | 0.00 | 0.21 | 0.73 | 0.04 |
| EGFR     | astrocyte           | 0.00 | 0.15 | 0.85 | 0.00 | 0.00 | 0.00 |
| SOX9     | astrocyte           | 0.30 | 0.37 | 0.23 | 0.00 | 0.00 | 0.09 |
| CLDN10   | astrocyte           | 0.00 | 0.32 | 0.00 | 0.00 | 0.11 | 0.57 |
| PLCD4    | astrocyte           | 0.42 | 0.30 | 0.08 | 0.00 | 0.00 | 0.20 |
| ID4      | astrocyte           | 0.24 | 0.53 | 0.22 | 0.00 | 0.00 | 0.01 |
| FMO1     | astrocyte           | 0.10 | 0.26 | 0.00 | 0.36 | 0.00 | 0.27 |
| EMP2     | astrocyte           | 0.45 | 0.00 | 0.09 | 0.24 | 0.00 | 0.22 |
| LONRF3   | astrocyte           | 0.00 | 0.01 | 0.59 | 0.00 | 0.00 | 0.41 |
| HTRA1    | astrocyte           | 0.21 | 0.31 | 0.00 | 0.08 | 0.31 | 0.08 |
| MGST1    | astrocyte           | 0.00 | 0.13 | 0.55 | 0.00 | 0.17 | 0.15 |
| THRSP    | astrocyte           | 0.17 | 0.38 | 0.00 | 0.36 | 0.00 | 0.09 |
| HSD11B1  | astrocyte           | 0.00 | 0.20 | 0.00 | 0.00 | 0.37 | 0.43 |
| LGI4     | astrocyte           | 0.00 | 0.29 | 0.00 | 0.00 | 0.26 | 0.45 |
| ITGB5    | astrocyte           | 0.00 | 0.00 | 0.27 | 0.54 | 0.00 | 0.19 |
| AIFM3    | astrocyte           | 0.00 | 0.22 | 0.00 | 0.00 | 0.16 | 0.61 |
| AXL      | astrocyte           | 0.00 | 0.32 | 0.07 | 0.43 | 0.00 | 0.18 |
| ADORA2B  | astrocyte           | 0.28 | 0.20 | 0.07 | 0.00 | 0.00 | 0.45 |
| CBR3     | astrocyte           | 0.52 | 0.07 | 0.11 | 0.05 | 0.00 | 0.25 |
| EPHX2    | astrocyte           | 0.00 | 0.45 | 0.14 | 0.00 | 0.18 | 0.24 |
| SLC27A1  | astrocyte           | 0.13 | 0.23 | 0.02 | 0.01 | 0.62 | 0.00 |
| SCARA3   | astrocyte           | 0.15 | 0.35 | 0.24 | 0.11 | 0.00 | 0.15 |
| NR2E1    | astrocyte           | 0.04 | 0.43 | 0.22 | 0.00 | 0.00 | 0.31 |
| LCN2     | reactive astrocytes | 0.00 | 0.00 | 0.00 | 0.82 | 0.00 | 0.18 |
| CLCF1    | reactive astrocytes | 0.00 | 0.00 | 0.87 | 0.07 | 0.00 | 0.05 |
| STEAP4   | reactive astrocytes | 0.00 | 0.00 | 0.00 | 0.93 | 0.00 | 0.07 |
| TGM1     | reactive astrocytes | 0.00 | 0.22 | 0.00 | 0.35 | 0.01 | 0.42 |
| S1PR3    | reactive astrocytes | 0.21 | 0.27 | 0.38 | 0.14 | 0.00 | 0.00 |
| PTX3     | reactive astrocytes | 0.43 | 0.00 | 0.57 | 0.00 | 0.00 | 0.00 |
| S100A10  | reactive astrocytes | 0.16 | 0.00 | 0.45 | 0.39 | 0.00 | 0.00 |
| SPHK1    | reactive astrocytes | 0.13 | 0.00 | 0.05 | 0.82 | 0.00 | 0.00 |
| TIMP1    | reactive astrocytes | 0.08 | 0.00 | 0.21 | 0.70 | 0.00 | 0.00 |
| CD109    | reactive astrocytes | 0.00 | 0.17 | 0.47 | 0.06 | 0.12 | 0.19 |
| PTGS2    | reactive astrocytes | 0.00 | 0.00 | 0.00 | 0.45 | 0.10 | 0.45 |
| SERPING1 | reactive astrocytes | 0.00 | 0.00 | 0.59 | 0.27 | 0.00 | 0.14 |
| EMP1     | reactive astrocytes | 0.00 | 0.00 | 0.31 | 0.69 | 0.00 | 0.00 |
| SLC10A6  | reactive astrocytes | 0.00 | 0.00 | 0.24 | 0.24 | 0.41 | 0.10 |
| TM4SF1   | reactive astrocytes | 0.74 | 0.00 | 0.09 | 0.17 | 0.00 | 0.00 |
| B3GNT5   | reactive astrocytes | 0.25 | 0.00 | 0.71 | 0.00 | 0.00 | 0.03 |
| HSPB1    | reactive astrocytes | 0.00 | 0.06 | 0.59 | 0.35 | 0.00 | 0.00 |
| GBP2     | reactive astrocytes | 0.00 | 0.00 | 0.45 | 0.55 | 0.00 | 0.00 |
| CD14     | reactive astrocytes | 0.00 | 0.00 | 0.13 | 0.87 | 0.00 | 0.00 |
| FBLN5    | reactive astrocytes | 0.00 | 0.08 | 0.05 | 0.69 | 0.00 | 0.18 |
| GALNTL2  | reactive astrocytes | 0.00 | 0.41 | 0.14 | 0.03 | 0.42 | 0.00 |
| FKBP5    | reactive astrocytes | 0.00 | 0.00 | 0.05 | 0.87 | 0.04 | 0.05 |
| IGFBP3   | reactive astrocytes | 0.56 | 0.00 | 0.44 | 0.00 | 0.00 | 0.00 |
| KLF5     | reactive astrocytes | 0.00 | 0.03 | 0.25 | 0.00 | 0.00 | 0.72 |
| CXCL10   | reactive astrocytes | 0.00 | 0.00 | 0.63 | 0.37 | 0.00 | 0.00 |
| CD44     | reactive astrocytes | 0.00 | 0.00 | 1.00 | 0.00 | 0.00 | 0.00 |
| HMOX1    | reactive astrocytes | 0.52 | 0.00 | 0.37 | 0.12 | 0.00 | 0.00 |
| LGALS3   | reactive astrocytes | 0.07 | 0.04 | 0.38 | 0.29 | 0.00 | 0.21 |
| OSMR     | reactive astrocytes | 0.09 | 0.01 | 0.50 | 0.35 | 0.00 | 0.05 |
| PSMB8    | reactive astrocytes | 0.26 | 0.21 | 0.25 | 0.28 | 0.00 | 0.00 |
| GAP43    | reactive astrocytes | 0.21 | 0.01 | 0.15 | 0.00 | 0.00 | 0.63 |
| GDF15    | reactive astrocytes | 0.55 | 0.00 | 0.34 | 0.11 | 0.00 | 0.00 |
| FLNC     | reactive astrocytes | 0.00 | 0.50 | 0.12 | 0.38 | 0.00 | 0.00 |
| ANXA2    | reactive astrocytes | 0.00 | 0.00 | 0.74 | 0.26 | 0.00 | 0.00 |

|           |                     |      |      |      |      |      |      |
|-----------|---------------------|------|------|------|------|------|------|
| SBNO2     | reactive astrocytes | 0.36 | 0.05 | 0.36 | 0.17 | 0.00 | 0.06 |
| TUBB6     | reactive astrocytes | 0.29 | 0.00 | 0.36 | 0.35 | 0.00 | 0.00 |
| SRGN      | reactive astrocytes | 0.00 | 0.00 | 0.06 | 0.85 | 0.00 | 0.09 |
| ASNS      | reactive astrocytes | 0.31 | 0.15 | 0.14 | 0.00 | 0.00 | 0.40 |
| SRXN1     | reactive astrocytes | 0.00 | 0.00 | 0.38 | 0.00 | 0.00 | 0.62 |
| TNFRSF12A | reactive astrocytes | 0.24 | 0.00 | 0.59 | 0.17 | 0.00 | 0.00 |
| CTGF      | reactive astrocytes | 0.00 | 0.00 | 0.00 | 0.97 | 0.00 | 0.03 |
| GCNT2     | reactive astrocytes | 0.74 | 0.00 | 0.13 | 0.04 | 0.00 | 0.09 |
| AMIGO2    | reactive astrocytes | 0.00 | 0.06 | 0.57 | 0.00 | 0.00 | 0.37 |
| CP        | reactive astrocytes | 0.00 | 0.03 | 0.18 | 0.57 | 0.22 | 0.00 |
| HMGA1     | reactive astrocytes | 0.59 | 0.00 | 0.15 | 0.00 | 0.00 | 0.25 |
| GADD45B   | reactive astrocytes | 0.00 | 0.00 | 0.05 | 0.77 | 0.00 | 0.18 |
| ANXA3     | reactive astrocytes | 0.00 | 0.26 | 0.00 | 0.00 | 0.24 | 0.51 |
| VEGF      | reactive astrocytes | 0.64 | 0.00 | 0.07 | 0.00 | 0.00 | 0.29 |
| ASPG      | reactive astrocytes | 0.00 | 0.00 | 0.00 | 0.00 | 0.00 | 1.00 |
| VIM       | reactive astrocytes | 0.22 | 0.00 | 0.73 | 0.02 | 0.00 | 0.03 |
| ODZ2      | reactive astrocytes | 0.00 | 0.11 | 0.01 | 0.00 | 0.00 | 0.88 |
| AKAP12    | reactive astrocytes | 0.21 | 0.00 | 0.17 | 0.07 | 0.00 | 0.55 |
| ICAM1     | reactive astrocytes | 0.12 | 0.00 | 0.15 | 0.69 | 0.00 | 0.04 |
| IER3      | reactive astrocytes | 0.00 | 0.00 | 0.00 | 0.94 | 0.04 | 0.02 |
| IFITM3    | reactive astrocytes | 0.00 | 0.35 | 0.11 | 0.53 | 0.00 | 0.00 |
| SULF2     | reactive astrocytes | 0.73 | 0.00 | 0.12 | 0.04 | 0.00 | 0.12 |
| HSPB6     | reactive astrocytes | 0.00 | 0.60 | 0.14 | 0.01 | 0.14 | 0.10 |
| ENDOU     | reactive astrocytes | 0.00 | 0.51 | 0.00 | 0.00 | 0.17 | 0.33 |
| SLC39A14  | reactive astrocytes | 0.23 | 0.00 | 0.53 | 0.00 | 0.00 | 0.25 |
| TAPBP     | reactive astrocytes | 0.20 | 0.23 | 0.23 | 0.09 | 0.00 | 0.26 |
| CRISPLD2  | reactive astrocytes | 0.00 | 0.00 | 0.00 | 0.71 | 0.13 | 0.16 |
| GSR       | reactive astrocytes | 0.16 | 0.06 | 0.40 | 0.00 | 0.00 | 0.38 |
| CXCL1     | reactive astrocytes | 0.00 | 0.00 | 0.00 | 0.95 | 0.05 | 0.00 |
| GBP3      | reactive astrocytes | 0.12 | 0.44 | 0.44 | 0.00 | 0.00 | 0.00 |
| TSPAN4    | reactive astrocytes | 0.13 | 0.00 | 0.18 | 0.51 | 0.00 | 0.18 |
| OLFM1     | reactive astrocytes | 0.00 | 0.00 | 0.00 | 0.00 | 0.00 | 1.00 |
| CHI3L1    | reactive astrocytes | 0.03 | 0.00 | 0.97 | 0.00 | 0.00 | 0.00 |
| B2M       | reactive astrocytes | 0.07 | 0.16 | 0.19 | 0.57 | 0.00 | 0.01 |
| C4B       | reactive astrocytes | 0.00 | 0.59 | 0.13 | 0.28 | 0.00 | 0.00 |
| A2M       | reactive astrocytes | 0.21 | 0.00 | 0.24 | 0.45 | 0.00 | 0.10 |
| SLC22A4   | reactive astrocytes | 0.14 | 0.33 | 0.21 | 0.29 | 0.00 | 0.03 |
| NEK6      | reactive astrocytes | 0.31 | 0.14 | 0.38 | 0.00 | 0.00 | 0.17 |
| SORBS1    | reactive astrocytes | 0.00 | 0.70 | 0.00 | 0.00 | 0.07 | 0.23 |
| ENTPD1    | microglia           | 0.28 | 0.12 | 0.09 | 0.39 | 0.00 | 0.12 |
| MALAT1    | microglia           | 0.20 | 0.16 | 0.27 | 0.20 | 0.16 | 0.00 |
| CASP8     | microglia           | 0.00 | 0.32 | 0.21 | 0.34 | 0.00 | 0.13 |
| IKZF1     | microglia           | 0.00 | 0.17 | 0.00 | 0.80 | 0.00 | 0.03 |
| CD33      | microglia           | 0.00 | 0.05 | 0.05 | 0.82 | 0.04 | 0.03 |
| AIM2      | microglia           | 0.00 | 0.00 | 0.52 | 0.37 | 0.00 | 0.11 |
| CXorf21   | microglia           | 0.00 | 0.00 | 0.00 | 0.99 | 0.01 | 0.00 |
| SSH2      | microglia           | 0.04 | 0.00 | 0.05 | 0.48 | 0.43 | 0.00 |
| GAL3ST4   | microglia           | 0.30 | 0.21 | 0.17 | 0.33 | 0.00 | 0.00 |
| LAIR1     | microglia           | 0.00 | 0.06 | 0.16 | 0.78 | 0.00 | 0.00 |
| GTF2H2    | microglia           | 0.22 | 0.29 | 0.19 | 0.29 | 0.00 | 0.00 |
| SLCO2B1   | microglia           | 0.00 | 0.16 | 0.00 | 0.71 | 0.03 | 0.10 |
| ARAP3     | microglia           | 0.61 | 0.10 | 0.22 | 0.00 | 0.00 | 0.07 |
| IVNS1ABP  | microglia           | 0.37 | 0.14 | 0.11 | 0.22 | 0.16 | 0.00 |
| SLC29A3   | microglia           | 0.13 | 0.21 | 0.00 | 0.26 | 0.25 | 0.15 |
| CCR5      | microglia           | 0.00 | 0.00 | 0.29 | 0.71 | 0.00 | 0.01 |
| C1orf162  | microglia           | 0.21 | 0.00 | 0.18 | 0.60 | 0.01 | 0.00 |
| TMEM119   | microglia           | 0.00 | 0.14 | 0.00 | 0.75 | 0.11 | 0.01 |
| JUN       | microglia           | 0.28 | 0.00 | 0.19 | 0.34 | 0.00 | 0.20 |
| P2RY12    | microglia           | 0.00 | 0.16 | 0.00 | 0.33 | 0.32 | 0.19 |
| GNGT2     | microglia           | 0.05 | 0.21 | 0.09 | 0.53 | 0.00 | 0.11 |
| CX3CR1    | microglia           | 0.00 | 0.39 | 0.00 | 0.38 | 0.17 | 0.06 |
| PTGS1     | microglia           | 0.04 | 0.28 | 0.04 | 0.60 | 0.00 | 0.04 |
| DDX43     | microglia           | 0.00 | 0.77 | 0.00 | 0.04 | 0.20 | 0.00 |

|          |                 |      |      |      |      |      |      |
|----------|-----------------|------|------|------|------|------|------|
| LYN      | microglia       | 0.00 | 0.11 | 0.07 | 0.72 | 0.00 | 0.10 |
| RNF41    | microglia       | 0.00 | 0.02 | 0.07 | 0.02 | 0.00 | 0.89 |
| ZNF839   | microglia       | 0.27 | 0.13 | 0.12 | 0.00 | 0.29 | 0.20 |
| RGS2     | microglia       | 0.03 | 0.00 | 0.23 | 0.43 | 0.00 | 0.31 |
| C3AR1    | microglia       | 0.00 | 0.00 | 0.00 | 0.96 | 0.01 | 0.03 |
| DRAM2    | microglia       | 0.18 | 0.21 | 0.09 | 0.51 | 0.01 | 0.00 |
| RGS1     | microglia       | 0.00 | 0.00 | 0.16 | 0.79 | 0.01 | 0.04 |
| IL1RL2   | microglia       | 0.00 | 0.00 | 0.03 | 0.02 | 0.00 | 0.95 |
| HPS3     | microglia       | 0.11 | 0.27 | 0.16 | 0.46 | 0.00 | 0.00 |
| PPP1R10  | microglia       | 0.40 | 0.04 | 0.07 | 0.49 | 0.00 | 0.00 |
| SCMH1    | microglia       | 0.29 | 0.01 | 0.36 | 0.00 | 0.00 | 0.34 |
| S1PR4    | microglia       | 0.00 | 0.00 | 0.00 | 0.86 | 0.00 | 0.14 |
| POU2F2   | microglia       | 0.00 | 0.37 | 0.00 | 0.42 | 0.00 | 0.21 |
| FOSB     | microglia       | 0.00 | 0.00 | 0.00 | 0.60 | 0.00 | 0.40 |
| SIGLEC8  | microglia       | 0.00 | 0.29 | 0.00 | 0.58 | 0.13 | 0.00 |
| ARHGDI3  | microglia       | 0.15 | 0.05 | 0.06 | 0.71 | 0.00 | 0.02 |
| EGR2     | microglia       | 0.00 | 0.00 | 0.00 | 0.81 | 0.13 | 0.06 |
| CMKLR1   | microglia       | 0.00 | 0.00 | 0.00 | 0.96 | 0.00 | 0.04 |
| EPB41L2  | microglia       | 0.00 | 0.17 | 0.00 | 0.37 | 0.33 | 0.12 |
| PHC3     | microglia       | 0.38 | 0.00 | 0.12 | 0.35 | 0.00 | 0.16 |
| PRPF38B  | microglia       | 0.41 | 0.31 | 0.19 | 0.02 | 0.07 | 0.00 |
| CCL4     | microglia       | 0.00 | 0.00 | 0.00 | 0.80 | 0.20 | 0.00 |
| FNBP1    | microglia       | 0.00 | 0.10 | 0.00 | 0.00 | 0.88 | 0.02 |
| SPAG7    | microglia       | 0.45 | 0.10 | 0.00 | 0.15 | 0.00 | 0.30 |
| ZDHHC24  | microglia       | 0.13 | 0.28 | 0.06 | 0.23 | 0.14 | 0.17 |
| MID1     | microglia       | 0.31 | 0.24 | 0.29 | 0.00 | 0.00 | 0.16 |
| TAGAP    | microglia       | 0.00 | 0.00 | 0.06 | 0.94 | 0.00 | 0.00 |
| PRG4     | microglia       | 0.00 | 0.00 | 0.00 | 0.93 | 0.00 | 0.07 |
| OSM      | microglia       | 0.00 | 0.00 | 0.00 | 1.00 | 0.00 | 0.00 |
| FGD2     | microglia       | 0.00 | 0.17 | 0.00 | 0.66 | 0.13 | 0.04 |
| CNOT2    | microglia       | 0.54 | 0.18 | 0.24 | 0.00 | 0.04 | 0.00 |
| CEP95    | microglia       | 0.82 | 0.07 | 0.11 | 0.00 | 0.00 | 0.00 |
| ACIN1    | microglia       | 0.59 | 0.37 | 0.04 | 0.00 | 0.00 | 0.00 |
| FAM166A  | microglia       | 0.33 | 0.11 | 0.16 | 0.02 | 0.00 | 0.38 |
| SLAMF8   | microglia       | 0.00 | 0.00 | 0.20 | 0.79 | 0.00 | 0.01 |
| C8orf4   | microglia       | 0.18 | 0.00 | 0.73 | 0.00 | 0.00 | 0.09 |
| SLC15A3  | microglia       | 0.00 | 0.25 | 0.01 | 0.73 | 0.00 | 0.01 |
| KCNRG    | microglia       | 0.18 | 0.66 | 0.00 | 0.00 | 0.00 | 0.16 |
| NPLOC4   | microglia       | 0.00 | 0.00 | 0.69 | 0.00 | 0.29 | 0.02 |
| TYROBP   | microglia       | 0.00 | 0.08 | 0.04 | 0.88 | 0.01 | 0.00 |
| IPCEF1   | microglia       | 0.00 | 0.00 | 0.01 | 0.06 | 0.06 | 0.88 |
| C1orf27  | microglia       | 0.33 | 0.39 | 0.11 | 0.00 | 0.17 | 0.00 |
| PTPN6    | microglia       | 0.00 | 0.00 | 0.00 | 0.98 | 0.01 | 0.01 |
| INPP5D   | microglia       | 0.00 | 0.25 | 0.48 | 0.26 | 0.00 | 0.00 |
| UBAP2L   | microglia       | 0.46 | 0.20 | 0.18 | 0.00 | 0.00 | 0.16 |
| TOR1AIP1 | microglia       | 0.03 | 0.74 | 0.14 | 0.10 | 0.00 | 0.00 |
| PCBP2    | microglia       | 0.51 | 0.18 | 0.20 | 0.06 | 0.00 | 0.06 |
| SNORA31  | microglia       | 0.14 | 0.13 | 0.00 | 0.66 | 0.00 | 0.07 |
| MOCS2    | microglia       | 0.18 | 0.36 | 0.05 | 0.06 | 0.00 | 0.35 |
| LY96     | microglia       | 0.00 | 0.00 | 0.17 | 0.79 | 0.00 | 0.04 |
| CNBP     | microglia       | 0.70 | 0.08 | 0.21 | 0.01 | 0.00 | 0.00 |
| PIK3CG   | microglia       | 0.00 | 0.01 | 0.17 | 0.68 | 0.05 | 0.09 |
| TNF      | microglia       | 0.00 | 0.00 | 0.00 | 0.77 | 0.23 | 0.00 |
| MOG      | oligodendrocyte | 0.00 | 0.06 | 0.00 | 0.05 | 0.89 | 0.00 |
| MOBP     | oligodendrocyte | 0.08 | 0.00 | 0.00 | 0.02 | 0.90 | 0.00 |
| ENPP6    | oligodendrocyte | 0.03 | 0.09 | 0.00 | 0.32 | 0.56 | 0.00 |
| CLDN11   | oligodendrocyte | 0.02 | 0.00 | 0.00 | 0.08 | 0.90 | 0.00 |
| MAG      | oligodendrocyte | 0.02 | 0.03 | 0.00 | 0.01 | 0.94 | 0.00 |
| PLEKHH1  | oligodendrocyte | 0.00 | 0.06 | 0.00 | 0.00 | 0.94 | 0.00 |
| FA2H     | oligodendrocyte | 0.04 | 0.00 | 0.00 | 0.00 | 0.95 | 0.00 |
| SGK2     | oligodendrocyte | 0.00 | 0.15 | 0.00 | 0.07 | 0.77 | 0.01 |
| IL23A    | oligodendrocyte | 0.61 | 0.00 | 0.12 | 0.13 | 0.00 | 0.14 |
| MBP      | oligodendrocyte | 0.03 | 0.00 | 0.00 | 0.06 | 0.91 | 0.00 |

|          |                 |      |      |      |      |      |      |
|----------|-----------------|------|------|------|------|------|------|
| GPR62    | oligodendrocyte | 0.01 | 0.06 | 0.00 | 0.00 | 0.92 | 0.00 |
| TSPAN2   | oligodendrocyte | 0.12 | 0.00 | 0.31 | 0.29 | 0.00 | 0.28 |
| MAL      | oligodendrocyte | 0.00 | 0.00 | 0.00 | 0.00 | 1.00 | 0.00 |
| ERBB3    | oligodendrocyte | 0.11 | 0.03 | 0.00 | 0.00 | 0.86 | 0.00 |
| ADAMTS4  | oligodendrocyte | 0.00 | 0.13 | 0.01 | 0.11 | 0.74 | 0.00 |
| ELOVL7   | oligodendrocyte | 0.00 | 0.14 | 0.00 | 0.15 | 0.68 | 0.03 |
| PPP1R14A | oligodendrocyte | 0.02 | 0.00 | 0.00 | 0.08 | 0.90 | 0.00 |
| PLP1     | oligodendrocyte | 0.00 | 0.03 | 0.00 | 0.10 | 0.87 | 0.00 |
| PLXNB3   | oligodendrocyte | 0.27 | 0.05 | 0.03 | 0.00 | 0.66 | 0.00 |
| GAL3ST1  | oligodendrocyte | 0.26 | 0.03 | 0.02 | 0.03 | 0.66 | 0.00 |
| BCAS1    | oligodendrocyte | 0.18 | 0.00 | 0.00 | 0.03 | 0.78 | 0.01 |
| SRPK3    | oligodendrocyte | 0.42 | 0.10 | 0.01 | 0.00 | 0.46 | 0.00 |
| CPM      | oligodendrocyte | 0.30 | 0.31 | 0.22 | 0.10 | 0.06 | 0.00 |
| EVI2A    | oligodendrocyte | 0.02 | 0.02 | 0.00 | 0.07 | 0.89 | 0.00 |
| PLA2G4A  | oligodendrocyte | 0.23 | 0.09 | 0.25 | 0.31 | 0.00 | 0.12 |
| GSN      | oligodendrocyte | 0.00 | 0.20 | 0.00 | 0.37 | 0.43 | 0.00 |
| PRKCQ    | oligodendrocyte | 0.00 | 0.03 | 0.04 | 0.03 | 0.78 | 0.12 |
| SEMA3D   | oligodendrocyte | 0.00 | 0.25 | 0.40 | 0.00 | 0.06 | 0.29 |
| GALNT6   | oligodendrocyte | 0.00 | 0.22 | 0.00 | 0.00 | 0.78 | 0.00 |
| PDLIM2   | oligodendrocyte | 0.26 | 0.27 | 0.05 | 0.22 | 0.00 | 0.20 |
| RFFL     | oligodendrocyte | 0.06 | 0.20 | 0.08 | 0.04 | 0.62 | 0.00 |
| GPR17    | oligodendrocyte | 0.83 | 0.00 | 0.17 | 0.00 | 0.00 | 0.00 |
| HAPLN2   | oligodendrocyte | 0.07 | 0.10 | 0.00 | 0.00 | 0.83 | 0.00 |
| GJB1     | oligodendrocyte | 0.00 | 0.05 | 0.00 | 0.15 | 0.80 | 0.00 |
| SFT2D1   | oligodendrocyte | 0.12 | 0.12 | 0.06 | 0.08 | 0.63 | 0.00 |
| LGI3     | oligodendrocyte | 0.00 | 0.02 | 0.00 | 0.00 | 0.76 | 0.21 |
| NXK6-2   | oligodendrocyte | 0.00 | 0.18 | 0.00 | 0.02 | 0.80 | 0.00 |
| SOX10    | oligodendrocyte | 0.60 | 0.00 | 0.00 | 0.04 | 0.35 | 0.00 |
| ADSSL1   | oligodendrocyte | 0.21 | 0.08 | 0.09 | 0.09 | 0.53 | 0.00 |
| SLC45A3  | oligodendrocyte | 0.00 | 0.17 | 0.00 | 0.08 | 0.75 | 0.00 |
| ANLN     | oligodendrocyte | 0.00 | 0.14 | 0.00 | 0.05 | 0.80 | 0.00 |
| TNNI1    | oligodendrocyte | 0.49 | 0.23 | 0.00 | 0.26 | 0.00 | 0.02 |
| PLL      | oligodendrocyte | 0.11 | 0.00 | 0.00 | 0.00 | 0.88 | 0.02 |
| CYP27A1  | oligodendrocyte | 0.00 | 0.22 | 0.07 | 0.13 | 0.56 | 0.01 |
| KNDC1    | oligodendrocyte | 0.00 | 0.19 | 0.00 | 0.00 | 0.00 | 0.81 |
| DOCK10   | oligodendrocyte | 0.11 | 0.17 | 0.03 | 0.03 | 0.66 | 0.00 |
| CHN2     | oligodendrocyte | 0.00 | 0.20 | 0.01 | 0.03 | 0.61 | 0.14 |
| ST18     | oligodendrocyte | 0.00 | 0.16 | 0.00 | 0.06 | 0.79 | 0.00 |
| MYO1D    | oligodendrocyte | 0.00 | 0.05 | 0.00 | 0.17 | 0.76 | 0.02 |
| CPOX     | oligodendrocyte | 0.00 | 0.18 | 0.02 | 0.01 | 0.78 | 0.00 |
| PPAP2C   | oligodendrocyte | 0.06 | 0.10 | 0.00 | 0.02 | 0.83 | 0.00 |
| UNC5B    | oligodendrocyte | 0.00 | 0.25 | 0.02 | 0.15 | 0.57 | 0.00 |
| DDC      | oligodendrocyte | 0.00 | 0.00 | 0.13 | 0.39 | 0.30 | 0.18 |
| TRIM59   | oligodendrocyte | 0.18 | 0.09 | 0.04 | 0.00 | 0.69 | 0.00 |
| PHLDB1   | oligodendrocyte | 0.10 | 0.05 | 0.01 | 0.00 | 0.84 | 0.00 |
| BFSP2    | oligodendrocyte | 0.00 | 0.00 | 0.88 | 0.00 | 0.00 | 0.12 |
| BMP4     | oligodendrocyte | 0.10 | 0.00 | 0.11 | 0.36 | 0.00 | 0.42 |
| MATN1    | oligodendrocyte | 0.45 | 0.00 | 0.07 | 0.04 | 0.31 | 0.13 |
| TMEFF2   | oligodendrocyte | 0.19 | 0.00 | 0.00 | 0.02 | 0.55 | 0.24 |
| RNF122   | oligodendrocyte | 0.78 | 0.00 | 0.22 | 0.00 | 0.00 | 0.00 |
| ICK      | oligodendrocyte | 0.49 | 0.00 | 0.05 | 0.03 | 0.40 | 0.04 |
| ARPC1B   | oligodendrocyte | 0.00 | 0.00 | 0.20 | 0.75 | 0.00 | 0.05 |
| NFASC    | oligodendrocyte | 0.00 | 0.26 | 0.04 | 0.00 | 0.59 | 0.11 |
| CNTN1    | oligodendrocyte | 0.13 | 0.36 | 0.00 | 0.00 | 0.03 | 0.48 |
| CLDN14   | oligodendrocyte | 0.05 | 0.00 | 0.00 | 0.32 | 0.62 | 0.00 |
| SLC12A2  | oligodendrocyte | 0.00 | 0.27 | 0.00 | 0.00 | 0.70 | 0.04 |
| LIMS2    | oligodendrocyte | 0.64 | 0.00 | 0.08 | 0.07 | 0.00 | 0.21 |
| TMEM182  | oligodendrocyte | 0.29 | 0.13 | 0.58 | 0.00 | 0.00 | 0.00 |
| DCT      | oligodendrocyte | 0.23 | 0.35 | 0.27 | 0.00 | 0.00 | 0.16 |
| HHIP     | oligodendrocyte | 0.00 | 0.01 | 0.00 | 0.00 | 0.94 | 0.05 |
| KCNA1    | oligodendrocyte | 0.00 | 0.00 | 0.00 | 0.00 | 0.00 | 1.00 |
| TMEM63A  | oligodendrocyte | 0.00 | 0.19 | 0.00 | 0.00 | 0.81 | 0.00 |
| TMEM141  | oligodendrocyte | 0.21 | 0.16 | 0.03 | 0.10 | 0.23 | 0.27 |

|         |                 |      |      |      |      |      |      |
|---------|-----------------|------|------|------|------|------|------|
| JOSD2   | oligodendrocyte | 0.14 | 0.11 | 0.05 | 0.11 | 0.53 | 0.07 |
| TMEM163 | oligodendrocyte | 0.40 | 0.00 | 0.20 | 0.00 | 0.00 | 0.40 |
| NEUROD6 | neuron          | 0.00 | 0.00 | 0.00 | 0.00 | 0.00 | 1.00 |
| GLRA2   | neuron          | 0.00 | 0.24 | 0.02 | 0.00 | 0.00 | 0.73 |
| PRDM8   | neuron          | 0.00 | 0.09 | 0.00 | 0.00 | 0.01 | 0.89 |
| SLA     | neuron          | 0.00 | 0.00 | 0.05 | 0.89 | 0.00 | 0.05 |
| CRH     | neuron          | 0.01 | 0.00 | 0.00 | 0.00 | 0.00 | 0.99 |
| GABRG2  | neuron          | 0.00 | 0.10 | 0.00 | 0.00 | 0.00 | 0.90 |
| HTR2C   | neuron          | 0.00 | 0.01 | 0.00 | 0.13 | 0.00 | 0.86 |
| HS3ST2  | neuron          | 0.00 | 0.22 | 0.00 | 0.10 | 0.01 | 0.67 |
| MAL2    | neuron          | 0.00 | 0.05 | 0.00 | 0.00 | 0.00 | 0.95 |
| GABRA5  | neuron          | 0.00 | 0.06 | 0.00 | 0.04 | 0.05 | 0.85 |
| NTS     | neuron          | 0.36 | 0.00 | 0.64 | 0.00 | 0.00 | 0.00 |
| GABRA1  | neuron          | 0.00 | 0.04 | 0.00 | 0.00 | 0.00 | 0.96 |
| SATB2   | neuron          | 0.29 | 0.17 | 0.09 | 0.00 | 0.00 | 0.45 |
| GPR88   | neuron          | 0.00 | 0.34 | 0.04 | 0.02 | 0.00 | 0.60 |
| SYT1    | neuron          | 0.00 | 0.11 | 0.00 | 0.00 | 0.00 | 0.89 |
| GDA     | neuron          | 0.00 | 0.10 | 0.00 | 0.00 | 0.04 | 0.87 |
| MYT1L   | neuron          | 0.00 | 0.05 | 0.00 | 0.00 | 0.00 | 0.95 |
| SLC17A6 | neuron          | 0.00 | 0.05 | 0.00 | 0.00 | 0.00 | 0.95 |
| NPAS4   | neuron          | 0.00 | 0.21 | 0.00 | 0.00 | 0.03 | 0.76 |
| CALB1   | neuron          | 0.00 | 0.13 | 0.00 | 0.00 | 0.00 | 0.87 |
| SLC12A5 | neuron          | 0.00 | 0.09 | 0.00 | 0.00 | 0.00 | 0.91 |
| EPHA7   | neuron          | 0.00 | 0.27 | 0.04 | 0.00 | 0.00 | 0.69 |
| VIP     | neuron          | 0.00 | 0.10 | 0.00 | 0.00 | 0.00 | 0.90 |
| MEF2C   | neuron          | 0.00 | 0.12 | 0.02 | 0.00 | 0.00 | 0.86 |
| SSTR2   | neuron          | 0.00 | 0.26 | 0.00 | 0.01 | 0.00 | 0.73 |
| PCSK2   | neuron          | 0.00 | 0.00 | 0.00 | 0.00 | 0.00 | 1.00 |
| SNAP25  | neuron          | 0.00 | 0.05 | 0.00 | 0.00 | 0.00 | 0.95 |
| SCG2    | neuron          | 0.30 | 0.00 | 0.14 | 0.00 | 0.00 | 0.56 |
| PGM2L1  | neuron          | 0.00 | 0.05 | 0.16 | 0.00 | 0.00 | 0.79 |
| PLCXD3  | neuron          | 0.00 | 0.16 | 0.07 | 0.01 | 0.00 | 0.76 |
| DLX1    | neuron          | 0.00 | 0.49 | 0.00 | 0.19 | 0.00 | 0.32 |
| VSNL1   | neuron          | 0.00 | 0.04 | 0.00 | 0.00 | 0.00 | 0.96 |
| SYT4    | neuron          | 0.00 | 0.09 | 0.00 | 0.00 | 0.00 | 0.90 |
| NRG3    | neuron          | 0.00 | 0.30 | 0.00 | 0.00 | 0.01 | 0.69 |
| ICAM5   | neuron          | 0.00 | 0.26 | 0.00 | 0.00 | 0.00 | 0.74 |
| KCNF1   | neuron          | 0.30 | 0.11 | 0.06 | 0.00 | 0.00 | 0.53 |
| CCK     | neuron          | 0.00 | 0.13 | 0.00 | 0.00 | 0.00 | 0.87 |
| TMEM130 | neuron          | 0.00 | 0.12 | 0.00 | 0.00 | 0.00 | 0.88 |
| CAMK4   | neuron          | 0.00 | 0.02 | 0.00 | 0.00 | 0.00 | 0.98 |
| ASPH    | neuron          | 0.00 | 0.30 | 0.17 | 0.00 | 0.00 | 0.53 |
| SLC6A7  | neuron          | 0.00 | 0.05 | 0.00 | 0.00 | 0.00 | 0.95 |
| ICA1L   | neuron          | 0.00 | 0.34 | 0.10 | 0.00 | 0.00 | 0.56 |
| MYO5B   | neuron          | 0.19 | 0.02 | 0.34 | 0.00 | 0.00 | 0.45 |
| NELL1   | neuron          | 0.00 | 0.03 | 0.01 | 0.05 | 0.00 | 0.91 |
| NEFM    | neuron          | 0.00 | 0.00 | 0.00 | 0.00 | 0.00 | 1.00 |
| NEFL    | neuron          | 0.00 | 0.00 | 0.00 | 0.00 | 0.00 | 1.00 |
| TTR     | neuron          | 0.00 | 0.00 | 0.00 | 1.00 | 0.00 | 0.00 |
| CDH8    | neuron          | 0.00 | 0.04 | 0.00 | 0.01 | 0.08 | 0.87 |
| SV2B    | neuron          | 0.00 | 0.05 | 0.00 | 0.00 | 0.04 | 0.91 |
| TRHDE   | neuron          | 0.00 | 0.00 | 0.00 | 0.04 | 0.00 | 0.95 |
| CAMK2B  | neuron          | 0.00 | 0.14 | 0.00 | 0.00 | 0.00 | 0.86 |
| RGS4    | neuron          | 0.00 | 0.00 | 0.01 | 0.00 | 0.00 | 0.99 |
| LPL     | neuron          | 0.75 | 0.00 | 0.25 | 0.00 | 0.00 | 0.00 |
| CACNA1B | neuron          | 0.00 | 0.14 | 0.00 | 0.00 | 0.00 | 0.86 |
| KCNC2   | neuron          | 0.00 | 0.05 | 0.00 | 0.00 | 0.00 | 0.95 |
| TTC9    | neuron          | 0.10 | 0.03 | 0.10 | 0.00 | 0.00 | 0.77 |
| L1CAM   | neuron          | 0.00 | 0.02 | 0.00 | 0.00 | 0.00 | 0.98 |
| CLSTN2  | neuron          | 0.00 | 0.22 | 0.09 | 0.03 | 0.00 | 0.65 |
| NAPB    | neuron          | 0.00 | 0.10 | 0.00 | 0.00 | 0.00 | 0.90 |
| CYB561  | neuron          | 0.00 | 0.19 | 0.10 | 0.04 | 0.00 | 0.68 |
| CXADR   | neuron          | 0.28 | 0.00 | 0.18 | 0.00 | 0.51 | 0.03 |

|         |        |      |      |      |      |      |      |
|---------|--------|------|------|------|------|------|------|
| HPCA    | neuron | 0.00 | 0.04 | 0.01 | 0.00 | 0.00 | 0.96 |
| CNKSR2  | neuron | 0.00 | 0.17 | 0.03 | 0.00 | 0.00 | 0.80 |
| UNC13A  | neuron | 0.00 | 0.08 | 0.00 | 0.00 | 0.00 | 0.92 |
| C1QTNF4 | neuron | 0.00 | 0.24 | 0.00 | 0.00 | 0.00 | 0.76 |
| CBLN1   | neuron | 0.11 | 0.00 | 0.00 | 0.00 | 0.00 | 0.89 |
| RHOV    | neuron | 0.00 | 0.04 | 0.01 | 0.00 | 0.00 | 0.95 |
| EFNA3   | neuron | 0.13 | 0.14 | 0.00 | 0.00 | 0.00 | 0.73 |
| HS6ST2  | neuron | 0.35 | 0.02 | 0.01 | 0.00 | 0.00 | 0.62 |
| GRP     | neuron | 0.48 | 0.00 | 0.00 | 0.00 | 0.00 | 0.52 |
| STX1A   | neuron | 0.01 | 0.06 | 0.00 | 0.06 | 0.00 | 0.87 |
| KCNQ2   | neuron | 0.58 | 0.00 | 0.00 | 0.00 | 0.00 | 0.42 |
| BCL11A  | neuron | 0.07 | 0.00 | 0.00 | 0.00 | 0.03 | 0.90 |
| ELAVL2  | neuron | 0.00 | 0.05 | 0.00 | 0.00 | 0.00 | 0.95 |
| NPTX1   | neuron | 0.00 | 0.08 | 0.00 | 0.00 | 0.00 | 0.92 |
| ATP1A3  | neuron | 0.00 | 0.07 | 0.00 | 0.00 | 0.00 | 0.93 |
| CALN1   | neuron | 0.00 | 0.13 | 0.00 | 0.00 | 0.06 | 0.81 |
| ENO2    | neuron | 0.00 | 0.00 | 0.05 | 0.00 | 0.00 | 0.95 |
| KCNV1   | neuron | 0.00 | 0.00 | 0.00 | 0.00 | 0.00 | 1.00 |
| SERTAD4 | neuron | 0.00 | 0.26 | 0.02 | 0.00 | 0.04 | 0.68 |
| SST     | neuron | 0.03 | 0.00 | 0.00 | 0.00 | 0.28 | 0.69 |

Table S3. We list cell type-specific genes, as reported in Cahoy *et al.*, (2008), Zamanian, *et al.* (2012) and Chiu, *et al.* (2013), along with their fractional expression level in each of 6 cell types, as predicted by deconvolution of the RNA-seq data from NE glioma and nonneoplastic brain (NB) samples.

| Classifier Genes | Subtype | OPC-like (OLIG2+) | Astrocyte (CD44-) | Astrocyte (CD44+) | Microglia | Oligodendrocyte | Neuron |
|------------------|---------|-------------------|-------------------|-------------------|-----------|-----------------|--------|
| ABAT             | PN      | 0.21              | 0.23              | 0.08              | 0.00      | 0.00            | 0.49   |
| ACTR1A           | PN      | 0.15              | 0.22              | 0.00              | 0.00      | 0.21            | 0.42   |
| ALCAM            | PN      | 0.24              | 0.09              | 0.02              | 0.00      | 0.66            | 0.00   |
| AMOTL2           | PN      | 0.29              | 0.13              | 0.00              | 0.00      | 0.57            | 0.00   |
| ARHGEF9          | PN      | 0.00              | 0.09              | 0.02              | 0.00      | 0.00            | 0.88   |
| ASCL1            | PN      | 0.89              | 0.00              | 0.02              | 0.00      | 0.00            | 0.08   |
| ATAD5            | PN      | 0.77              | 0.01              | 0.15              | 0.00      | 0.00            | 0.08   |
| ATP1A3           | PN      | 0.00              | 0.07              | 0.00              | 0.00      | 0.00            | 0.93   |
| BAI3             | PN      | 0.05              | 0.21              | 0.00              | 0.00      | 0.00            | 0.74   |
| BCAN             | PN      | 0.62              | 0.28              | 0.09              | 0.00      | 0.00            | 0.00   |
| BCL7A            | PN      | 0.46              | 0.08              | 0.00              | 0.00      | 0.00            | 0.46   |
| BCOR             | PN      | 0.97              | 0.00              | 0.00              | 0.00      | 0.00            | 0.03   |
| BEX1             | PN      | 0.19              | 0.10              | 0.00              | 0.00      | 0.00            | 0.71   |
| C1orf106         | PN      | 0.89              | 0.00              | 0.11              | 0.00      | 0.00            | 0.00   |
| C1orf61          | PN      | 0.59              | 0.37              | 0.00              | 0.00      | 0.00            | 0.04   |
| C1QL1            | PN      | 0.98              | 0.00              | 0.02              | 0.00      | 0.00            | 0.00   |
| CA10             | PN      | 0.40              | 0.00              | 0.04              | 0.00      | 0.00            | 0.56   |
| CASK             | PN      | 0.59              | 0.08              | 0.22              | 0.01      | 0.00            | 0.09   |
| CBX1             | PN      | 0.66              | 0.11              | 0.10              | 0.00      | 0.00            | 0.13   |
| CDC25A           | PN      | 0.86              | 0.00              | 0.14              | 0.00      | 0.00            | 0.00   |
| CDC7             | PN      | 0.61              | 0.00              | 0.19              | 0.00      | 0.00            | 0.20   |
| CDK5R1           | PN      | 0.00              | 0.07              | 0.00              | 0.00      | 0.00            | 0.93   |
| CDKN1B           | PN      | 0.01              | 0.05              | 0.00              | 0.00      | 0.91            | 0.02   |
| CHD7             | PN      | 0.97              | 0.01              | 0.01              | 0.00      | 0.00            | 0.00   |
| CKB              | PN      | 0.11              | 0.39              | 0.00              | 0.00      | 0.00            | 0.50   |
| CLASP2           | PN      | 0.00              | 0.16              | 0.00              | 0.00      | 0.58            | 0.26   |
| CLGN             | PN      | 0.30              | 0.15              | 0.04              | 0.00      | 0.00            | 0.51   |
| CNTN1            | PN      | 0.13              | 0.36              | 0.00              | 0.00      | 0.03            | 0.48   |
| CRB1             | PN      | 0.37              | 0.43              | 0.05              | 0.00      | 0.00            | 0.15   |
| CRMP1            | PN      | 0.47              | 0.00              | 0.16              | 0.00      | 0.00            | 0.37   |
| CSNK1E           | PN      | 0.68              | 0.15              | 0.03              | 0.00      | 0.00            | 0.15   |
| CSPG5            | PN      | 0.68              | 0.15              | 0.02              | 0.00      | 0.00            | 0.15   |
| CXXC4            | PN      | 0.50              | 0.13              | 0.06              | 0.00      | 0.00            | 0.31   |
| DBN1             | PN      | 0.48              | 0.09              | 0.15              | 0.00      | 0.00            | 0.29   |
| DCX              | PN      | 0.88              | 0.00              | 0.07              | 0.00      | 0.00            | 0.05   |
| DGKI             | PN      | 0.37              | 0.00              | 0.10              | 0.00      | 0.00            | 0.53   |
| DLL3             | PN      | 0.98              | 0.02              | 0.00              | 0.00      | 0.00            | 0.00   |
| DNM3             | PN      | 0.00              | 0.08              | 0.00              | 0.00      | 0.50            | 0.42   |
| DPF1             | PN      | 0.37              | 0.02              | 0.08              | 0.00      | 0.00            | 0.53   |
| DPP6             | PN      | 0.23              | 0.18              | 0.15              | 0.00      | 0.00            | 0.45   |
| DPYSL4           | PN      | 0.58              | 0.14              | 0.00              | 0.00      | 0.00            | 0.28   |
| DUSP26           | PN      | 0.12              | 0.00              | 0.00              | 0.00      | 0.00            | 0.88   |
| E2F3             | PN      | 0.49              | 0.00              | 0.26              | 0.00      | 0.00            | 0.26   |
| EPB41            | PN      | 0.24              | 0.16              | 0.18              | 0.31      | 0.00            | 0.12   |
| EPHB1            | PN      | 0.63              | 0.13              | 0.03              | 0.00      | 0.00            | 0.21   |
| ERBB3            | PN      | 0.11              | 0.03              | 0.00              | 0.00      | 0.86            | 0.00   |
| FAM110B          | PN      | 0.47              | 0.00              | 0.16              | 0.00      | 0.00            | 0.37   |
| FAM125B          | PN      | 0.05              | 0.20              | 0.00              | 0.15      | 0.60            | 0.00   |
| FBXO21           | PN      | 0.35              | 0.12              | 0.07              | 0.00      | 0.00            | 0.46   |
| FGF9             | PN      | 0.00              | 0.19              | 0.00              | 0.00      | 0.00            | 0.81   |
| FHOD3            | PN      | 0.26              | 0.02              | 0.14              | 0.00      | 0.00            | 0.59   |
| FLRT1            | PN      | 0.39              | 0.01              | 0.03              | 0.00      | 0.23            | 0.34   |
| FXYD6            | PN      | 0.42              | 0.17              | 0.05              | 0.00      | 0.00            | 0.36   |
| GABRA3           | PN      | 0.26              | 0.00              | 0.04              | 0.00      | 0.00            | 0.70   |
| GADD45G          | PN      | 0.58              | 0.26              | 0.00              | 0.00      | 0.00            | 0.16   |
| GNG4             | PN      | 0.61              | 0.00              | 0.08              | 0.00      | 0.00            | 0.30   |
| GPM6A            | PN      | 0.17              | 0.24              | 0.07              | 0.00      | 0.00            | 0.53   |
| GPR17            | PN      | 0.83              | 0.00              | 0.17              | 0.00      | 0.00            | 0.00   |
| GRIA2            | PN      | 0.17              | 0.20              | 0.01              | 0.00      | 0.00            | 0.62   |
| GRID2            | PN      | 0.85              | 0.00              | 0.09              | 0.00      | 0.00            | 0.07   |
| GSK3B            | PN      | 0.37              | 0.08              | 0.12              | 0.00      | 0.00            | 0.44   |

|          |    |      |      |      |      |      |      |
|----------|----|------|------|------|------|------|------|
| GSTA4    | PN | 0.45 | 0.11 | 0.06 | 0.00 | 0.00 | 0.37 |
| HDAC2    | PN | 0.66 | 0.00 | 0.15 | 0.06 | 0.00 | 0.13 |
| HMGB3    | PN | 0.82 | 0.00 | 0.09 | 0.00 | 0.00 | 0.09 |
| HN1      | PN | 0.72 | 0.00 | 0.15 | 0.00 | 0.00 | 0.13 |
| HOXD3    | PN | 0.95 | 0.00 | 0.05 | 0.00 | 0.00 | 0.00 |
| HRASLS   | PN | 0.75 | 0.00 | 0.18 | 0.00 | 0.00 | 0.07 |
| ICK      | PN | 0.49 | 0.00 | 0.05 | 0.03 | 0.40 | 0.04 |
| IL1RAPL1 | PN | 0.00 | 0.00 | 0.00 | 0.00 | 0.88 | 0.12 |
| KIF21B   | PN | 0.41 | 0.16 | 0.03 | 0.00 | 0.00 | 0.41 |
| KLRC3    | PN | 1.00 | 0.00 | 0.00 | 0.00 | 0.00 | 0.00 |
| KLRC4    | PN | 1.00 | 0.00 | 0.00 | 0.00 | 0.00 | 0.00 |
| KLRK1    | PN | 1.00 | 0.00 | 0.00 | 0.00 | 0.00 | 0.00 |
| LPHN3    | PN | 0.43 | 0.13 | 0.11 | 0.00 | 0.00 | 0.33 |
| LRP6     | PN | 0.53 | 0.19 | 0.11 | 0.00 | 0.17 | 0.00 |
| LRRTM4   | PN | 0.21 | 0.00 | 0.10 | 0.00 | 0.00 | 0.69 |
| MAP2     | PN | 0.21 | 0.14 | 0.02 | 0.00 | 0.00 | 0.63 |
| MAPT     | PN | 0.00 | 0.20 | 0.00 | 0.00 | 0.16 | 0.64 |
| MARCKS   | PN | 0.68 | 0.06 | 0.18 | 0.00 | 0.00 | 0.08 |
| MARCKSL1 | PN | 0.61 | 0.01 | 0.02 | 0.01 | 0.36 | 0.00 |
| MAST1    | PN | 0.00 | 0.16 | 0.00 | 0.00 | 0.00 | 0.84 |
| MATR3    | PN | 0.25 | 0.12 | 0.06 | 0.00 | 0.00 | 0.57 |
| MCM10    | PN | 0.96 | 0.00 | 0.04 | 0.00 | 0.00 | 0.00 |
| MLLT11   | PN | 0.19 | 0.09 | 0.04 | 0.00 | 0.00 | 0.68 |
| MMP15    | PN | 0.72 | 0.00 | 0.18 | 0.00 | 0.00 | 0.10 |
| MMP16    | PN | 0.95 | 0.00 | 0.02 | 0.00 | 0.00 | 0.03 |
| MPPED2   | PN | 0.65 | 0.00 | 0.01 | 0.00 | 0.00 | 0.35 |
| MTSS1    | PN | 0.57 | 0.00 | 0.00 | 0.24 | 0.19 | 0.00 |
| MYB      | PN | 0.99 | 0.00 | 0.00 | 0.00 | 0.00 | 0.01 |
| MYO10    | PN | 0.40 | 0.51 | 0.00 | 0.00 | 0.09 | 0.00 |
| MYT1     | PN | 1.00 | 0.00 | 0.00 | 0.00 | 0.00 | 0.00 |
| NCALD    | PN | 0.14 | 0.00 | 0.07 | 0.00 | 0.00 | 0.79 |
| NCAM1    | PN | 0.00 | 0.40 | 0.07 | 0.00 | 0.42 | 0.11 |
| NKX2-2   | PN | 0.78 | 0.00 | 0.00 | 0.20 | 0.01 | 0.00 |
| NLGN3    | PN | 0.57 | 0.23 | 0.04 | 0.02 | 0.00 | 0.15 |
| NOL4     | PN | 0.18 | 0.11 | 0.06 | 0.00 | 0.00 | 0.64 |
| NROB1    | PN | 0.92 | 0.00 | 0.08 | 0.00 | 0.00 | 0.00 |
| NRXN1    | PN | 0.00 | 0.22 | 0.00 | 0.00 | 0.00 | 0.78 |
| NRXN2    | PN | 0.00 | 0.00 | 0.00 | 0.00 | 0.00 | 1.00 |
| OLIG2    | PN | 1.00 | 0.00 | 0.00 | 0.00 | 0.00 | 0.00 |
| P2RX7    | PN | 0.25 | 0.12 | 0.02 | 0.00 | 0.61 | 0.00 |
| PAFAH1B3 | PN | 0.57 | 0.14 | 0.12 | 0.00 | 0.00 | 0.17 |
| PAK3     | PN | 0.00 | 0.05 | 0.01 | 0.00 | 0.00 | 0.94 |
| PAK7     | PN | 0.09 | 0.07 | 0.00 | 0.00 | 0.00 | 0.85 |
| PCDH11X  | PN | 0.00 | 0.11 | 0.00 | 0.00 | 0.00 | 0.89 |
| PCDH11Y  | PN | 0.00 | 0.19 | 0.00 | 0.00 | 0.00 | 0.81 |
| PDE10A   | PN | 0.54 | 0.00 | 0.00 | 0.00 | 0.00 | 0.46 |
| PELI1    | PN | 0.54 | 0.03 | 0.00 | 0.43 | 0.00 | 0.00 |
| PFN2     | PN | 0.25 | 0.18 | 0.04 | 0.00 | 0.00 | 0.54 |
| PHF16    | PN | 0.61 | 0.24 | 0.01 | 0.11 | 0.04 | 0.00 |
| PLCB4    | PN | 0.03 | 0.00 | 0.07 | 0.00 | 0.00 | 0.90 |
| PODXL2   | PN | 0.52 | 0.05 | 0.03 | 0.00 | 0.00 | 0.40 |
| PPM1D    | PN | 0.71 | 0.00 | 0.10 | 0.15 | 0.04 | 0.00 |
| PPM1E    | PN | 0.14 | 0.05 | 0.12 | 0.00 | 0.00 | 0.69 |
| PURG     | PN | 0.40 | 0.31 | 0.01 | 0.00 | 0.00 | 0.28 |
| RAB33A   | PN | 0.41 | 0.00 | 0.00 | 0.00 | 0.40 | 0.20 |
| RAD21    | PN | 0.67 | 0.13 | 0.08 | 0.00 | 0.12 | 0.00 |
| RALGPS1  | PN | 0.00 | 0.23 | 0.00 | 0.00 | 0.42 | 0.35 |
| RALGPS2  | PN | 0.38 | 0.00 | 0.16 | 0.11 | 0.00 | 0.35 |
| RAP2A    | PN | 0.48 | 0.00 | 0.10 | 0.00 | 0.00 | 0.41 |
| RBPJ     | PN | 0.26 | 0.01 | 0.06 | 0.00 | 0.67 | 0.00 |
| REEP1    | PN | 0.16 | 0.00 | 0.13 | 0.00 | 0.00 | 0.70 |
| RUFY3    | PN | 0.00 | 0.25 | 0.41 | 0.00 | 0.13 | 0.21 |
| SATB1    | PN | 0.32 | 0.03 | 0.00 | 0.00 | 0.00 | 0.64 |



|         |    |      |      |      |      |      |      |
|---------|----|------|------|------|------|------|------|
| SCG3    | PN | 0.28 | 0.00 | 0.00 | 0.00 | 0.00 | 0.71 |
| SCN3A   | PN | 0.43 | 0.00 | 0.08 | 0.00 | 0.00 | 0.49 |
| SEC61A2 | PN | 0.00 | 0.11 | 0.00 | 0.00 | 0.37 | 0.52 |
| SEZ6L   | PN | 0.32 | 0.19 | 0.00 | 0.00 | 0.00 | 0.48 |
| SLC1A1  | PN | 0.48 | 0.00 | 0.09 | 0.00 | 0.00 | 0.43 |
| SLCOSA1 | PN | 0.98 | 0.00 | 0.02 | 0.00 | 0.00 | 0.00 |
| SORCS3  | PN | 0.34 | 0.01 | 0.04 | 0.00 | 0.00 | 0.62 |
| SOX10   | PN | 0.60 | 0.00 | 0.00 | 0.04 | 0.35 | 0.00 |
| SOX11   | PN | 0.91 | 0.00 | 0.09 | 0.00 | 0.00 | 0.00 |
| SOX2    | PN | 0.57 | 0.09 | 0.31 | 0.00 | 0.00 | 0.03 |
| SOX4    | PN | 0.93 | 0.00 | 0.07 | 0.00 | 0.00 | 0.00 |
| SPTBN2  | PN | 0.00 | 0.04 | 0.00 | 0.00 | 0.00 | 0.96 |
| SRGAP3  | PN | 0.00 | 0.13 | 0.05 | 0.00 | 0.00 | 0.82 |
| STMN1   | PN | 0.16 | 0.06 | 0.00 | 0.00 | 0.41 | 0.36 |
| STMN4   | PN | 0.14 | 0.00 | 0.00 | 0.00 | 0.62 | 0.24 |
| TAF5    | PN | 0.79 | 0.00 | 0.00 | 0.00 | 0.00 | 0.21 |
| TMCC1   | PN | 0.50 | 0.08 | 0.23 | 0.08 | 0.00 | 0.10 |
| TMEFF1  | PN | 0.06 | 0.06 | 0.00 | 0.00 | 0.80 | 0.08 |
| TMEM35  | PN | 0.05 | 0.10 | 0.01 | 0.00 | 0.00 | 0.84 |
| TOP2B   | PN | 0.61 | 0.18 | 0.04 | 0.00 | 0.00 | 0.17 |
| TOPBP1  | PN | 0.54 | 0.11 | 0.19 | 0.00 | 0.00 | 0.16 |
| TOX3    | PN | 0.68 | 0.00 | 0.19 | 0.00 | 0.00 | 0.14 |
| TSPAN3  | PN | 0.28 | 0.45 | 0.11 | 0.00 | 0.00 | 0.16 |
| TTYH1   | PN | 0.44 | 0.35 | 0.00 | 0.00 | 0.06 | 0.15 |
| VAX2    | PN | 0.97 | 0.00 | 0.03 | 0.00 | 0.00 | 0.00 |
| VEZF1   | PN | 0.51 | 0.11 | 0.08 | 0.07 | 0.23 | 0.00 |
| WASF1   | PN | 0.18 | 0.02 | 0.02 | 0.00 | 0.00 | 0.78 |
| YPEL1   | PN | 0.31 | 0.04 | 0.00 | 0.00 | 0.00 | 0.66 |
| ZEB2    | PN | 0.11 | 0.07 | 0.02 | 0.05 | 0.75 | 0.00 |
| ZNF184  | PN | 0.24 | 0.14 | 0.11 | 0.00 | 0.00 | 0.51 |
| ZNF248  | PN | 0.09 | 0.00 | 0.00 | 0.00 | 0.01 | 0.89 |
| ZNF286A | PN | 0.79 | 0.11 | 0.10 | 0.00 | 0.00 | 0.00 |
| ZNF510  | PN | 0.34 | 0.16 | 0.13 | 0.00 | 0.00 | 0.37 |
| ZNF643  | PN | 0.47 | 0.02 | 0.09 | 0.00 | 0.00 | 0.41 |
| ZNF711  | PN | 0.55 | 0.10 | 0.08 | 0.00 | 0.00 | 0.26 |
| ZNF804A | PN | 0.11 | 0.12 | 0.08 | 0.00 | 0.00 | 0.69 |
| ABCD2   | CL | 0.00 | 0.37 | 0.02 | 0.00 | 0.00 | 0.62 |
| ACSBG1  | CL | 0.01 | 0.64 | 0.00 | 0.00 | 0.10 | 0.25 |
| ACSL3   | CL | 0.21 | 0.30 | 0.11 | 0.00 | 0.00 | 0.37 |
| ADAM19  | CL | 0.37 | 0.32 | 0.15 | 0.00 | 0.00 | 0.16 |
| AKT2    | CL | 0.67 | 0.20 | 0.07 | 0.00 | 0.00 | 0.06 |
| ANXA5   | CL | 0.24 | 0.17 | 0.31 | 0.27 | 0.00 | 0.01 |
| APBA3   | CL | 0.58 | 0.22 | 0.13 | 0.02 | 0.06 | 0.00 |
| ARNTL   | CL | 0.00 | 0.32 | 0.17 | 0.00 | 0.00 | 0.51 |
| B3GALT1 | CL | 0.03 | 0.32 | 0.07 | 0.00 | 0.00 | 0.58 |
| BLM     | CL | 0.67 | 0.10 | 0.23 | 0.00 | 0.00 | 0.01 |
| BTBD2   | CL | 0.30 | 0.15 | 0.05 | 0.00 | 0.00 | 0.50 |
| CALM1   | CL | 0.00 | 0.08 | 0.03 | 0.00 | 0.00 | 0.89 |
| CAMK2B  | CL | 0.00 | 0.14 | 0.00 | 0.00 | 0.00 | 0.86 |
| CC2D1A  | CL | 0.32 | 0.25 | 0.06 | 0.00 | 0.00 | 0.36 |
| CD151   | CL | 0.26 | 0.19 | 0.41 | 0.07 | 0.00 | 0.06 |
| CD3EAP  | CL | 0.34 | 0.21 | 0.13 | 0.00 | 0.00 | 0.32 |
| CD97    | CL | 0.23 | 0.17 | 0.12 | 0.32 | 0.17 | 0.00 |
| CDH2    | CL | 0.30 | 0.18 | 0.29 | 0.00 | 0.00 | 0.22 |
| CDH4    | CL | 0.00 | 0.24 | 0.23 | 0.00 | 0.02 | 0.52 |
| CDH6    | CL | 0.34 | 0.20 | 0.23 | 0.00 | 0.00 | 0.22 |
| CDK6    | CL | 0.64 | 0.21 | 0.13 | 0.02 | 0.00 | 0.00 |
| CLIP2   | CL | 0.57 | 0.16 | 0.16 | 0.00 | 0.00 | 0.11 |
| CREB5   | CL | 0.35 | 0.15 | 0.11 | 0.00 | 0.39 | 0.00 |
| DAG1    | CL | 0.32 | 0.32 | 0.21 | 0.00 | 0.00 | 0.15 |
| DENND2A | CL | 0.44 | 0.28 | 0.25 | 0.00 | 0.00 | 0.02 |
| DLC1    | CL | 0.00 | 0.43 | 0.00 | 0.07 | 0.44 | 0.05 |
| DMWD    | CL | 0.29 | 0.28 | 0.14 | 0.00 | 0.00 | 0.29 |

|          |    |      |      |      |      |      |      |
|----------|----|------|------|------|------|------|------|
| DOCK6    | CL | 0.58 | 0.13 | 0.09 | 0.10 | 0.00 | 0.10 |
| EGFR     | CL | 0.00 | 0.15 | 0.85 | 0.00 | 0.00 | 0.00 |
| ELOVL2   | CL | 0.14 | 0.57 | 0.15 | 0.00 | 0.00 | 0.14 |
| EPHB4    | CL | 0.26 | 0.38 | 0.36 | 0.00 | 0.00 | 0.00 |
| ERCC2    | CL | 0.40 | 0.21 | 0.12 | 0.00 | 0.00 | 0.27 |
| EXTL3    | CL | 0.31 | 0.17 | 0.21 | 0.00 | 0.00 | 0.31 |
| EYA2     | CL | 0.16 | 0.41 | 0.27 | 0.00 | 0.00 | 0.16 |
| FGFR3    | CL | 0.00 | 0.56 | 0.00 | 0.00 | 0.01 | 0.43 |
| FZD3     | CL | 0.24 | 0.27 | 0.14 | 0.00 | 0.00 | 0.35 |
| FZD7     | CL | 0.00 | 0.16 | 0.77 | 0.00 | 0.00 | 0.07 |
| GALNT4   | CL | 0.15 | 0.41 | 0.27 | 0.11 | 0.06 | 0.00 |
| GAS1     | CL | 1.00 | 0.00 | 0.00 | 0.00 | 0.00 | 0.00 |
| GJA1     | CL | 0.00 | 0.68 | 0.00 | 0.08 | 0.08 | 0.16 |
| GLG1     | CL | 0.19 | 0.49 | 0.18 | 0.00 | 0.14 | 0.00 |
| GLI2     | CL | 0.18 | 0.09 | 0.64 | 0.00 | 0.00 | 0.09 |
| GNAS     | CL | 0.29 | 0.12 | 0.07 | 0.00 | 0.00 | 0.52 |
| NGG7     | CL | 0.15 | 0.12 | 0.00 | 0.10 | 0.40 | 0.23 |
| GPR56    | CL | 0.41 | 0.45 | 0.12 | 0.00 | 0.00 | 0.02 |
| GRIK1    | CL | 0.00 | 0.38 | 0.11 | 0.00 | 0.00 | 0.50 |
| GRIK5    | CL | 0.22 | 0.28 | 0.16 | 0.00 | 0.00 | 0.35 |
| GSTK1    | CL | 0.17 | 0.21 | 0.48 | 0.03 | 0.00 | 0.11 |
| HMG20B   | CL | 0.45 | 0.31 | 0.15 | 0.08 | 0.00 | 0.00 |
| HS3ST3B1 | CL | 0.00 | 0.15 | 0.81 | 0.00 | 0.00 | 0.04 |
| HSPBP1   | CL | 0.35 | 0.20 | 0.08 | 0.01 | 0.00 | 0.36 |
| ILK      | CL | 0.13 | 0.06 | 0.34 | 0.34 | 0.00 | 0.13 |
| IRF3     | CL | 0.29 | 0.30 | 0.10 | 0.21 | 0.00 | 0.10 |
| IRS2     | CL | 0.09 | 0.06 | 0.46 | 0.00 | 0.00 | 0.39 |
| ITGA7    | CL | 0.17 | 0.44 | 0.33 | 0.00 | 0.00 | 0.06 |
| ITGB8    | CL | 0.25 | 0.51 | 0.23 | 0.00 | 0.02 | 0.00 |
| JAG1     | CL | 0.61 | 0.00 | 0.34 | 0.00 | 0.00 | 0.06 |
| JUND     | CL | 0.35 | 0.00 | 0.04 | 0.00 | 0.55 | 0.05 |
| KCNF1    | CL | 0.30 | 0.11 | 0.06 | 0.00 | 0.00 | 0.53 |
| KEAP1    | CL | 0.44 | 0.29 | 0.14 | 0.01 | 0.08 | 0.04 |
| KIAA0355 | CL | 0.30 | 0.17 | 0.16 | 0.06 | 0.31 | 0.00 |
| KLHDC8A  | CL | 0.44 | 0.36 | 0.21 | 0.00 | 0.00 | 0.00 |
| KLHL25   | CL | 0.54 | 0.34 | 0.08 | 0.00 | 0.00 | 0.05 |
| KLHL4    | CL | 0.19 | 0.27 | 0.13 | 0.03 | 0.37 | 0.00 |
| LAMB2    | CL | 0.28 | 0.43 | 0.28 | 0.01 | 0.00 | 0.00 |
| LFNG     | CL | 0.36 | 0.41 | 0.23 | 0.00 | 0.00 | 0.00 |
| LHFP     | CL | 0.16 | 0.27 | 0.17 | 0.17 | 0.00 | 0.23 |
| LMO2     | CL | 0.37 | 0.29 | 0.17 | 0.10 | 0.00 | 0.07 |
| LRFN3    | CL | 0.35 | 0.16 | 0.13 | 0.00 | 0.00 | 0.37 |
| LRP10    | CL | 0.12 | 0.40 | 0.09 | 0.39 | 0.00 | 0.00 |
| LRP5     | CL | 0.75 | 0.18 | 0.05 | 0.00 | 0.00 | 0.02 |
| MAB21L1  | CL | 0.25 | 0.35 | 0.24 | 0.00 | 0.00 | 0.16 |
| MCC      | CL | 0.22 | 0.40 | 0.19 | 0.00 | 0.00 | 0.19 |
| MEGF8    | CL | 0.23 | 0.28 | 0.08 | 0.00 | 0.00 | 0.41 |
| MEIS1    | CL | 0.25 | 0.25 | 0.04 | 0.00 | 0.46 | 0.00 |
| MEOX2    | CL | 0.17 | 0.51 | 0.32 | 0.00 | 0.00 | 0.00 |
| MLC1     | CL | 0.17 | 0.60 | 0.07 | 0.00 | 0.00 | 0.16 |
| MYO5C    | CL | 0.00 | 0.51 | 0.20 | 0.12 | 0.00 | 0.16 |
| NDP      | CL | 0.02 | 0.65 | 0.01 | 0.00 | 0.19 | 0.12 |
| NES      | CL | 0.53 | 0.10 | 0.37 | 0.00 | 0.00 | 0.00 |
| NPAS3    | CL | 0.41 | 0.41 | 0.08 | 0.00 | 0.00 | 0.10 |
| NPEPL1   | CL | 0.33 | 0.42 | 0.23 | 0.02 | 0.00 | 0.00 |
| NR2E1    | CL | 0.04 | 0.43 | 0.22 | 0.00 | 0.00 | 0.31 |
| NR2F6    | CL | 0.34 | 0.13 | 0.16 | 0.00 | 0.00 | 0.37 |
| OSBPL3   | CL | 0.02 | 0.28 | 0.55 | 0.00 | 0.00 | 0.15 |
| PCSK5    | CL | 0.00 | 0.30 | 0.17 | 0.34 | 0.00 | 0.19 |
| PDGFA    | CL | 0.35 | 0.00 | 0.11 | 0.01 | 0.53 | 0.00 |
| PEPD     | CL | 0.19 | 0.31 | 0.08 | 0.24 | 0.15 | 0.03 |
| PIPOX    | CL | 0.07 | 0.73 | 0.20 | 0.00 | 0.00 | 0.00 |
| PLA2G5   | CL | 0.00 | 0.36 | 0.48 | 0.00 | 0.00 | 0.16 |

|          |    |      |      |      |      |      |      |
|----------|----|------|------|------|------|------|------|
| PMP22    | CL | 0.01 | 0.10 | 0.05 | 0.19 | 0.64 | 0.00 |
| POFUT1   | CL | 0.31 | 0.23 | 0.26 | 0.10 | 0.00 | 0.11 |
| POMT2    | CL | 0.83 | 0.05 | 0.08 | 0.01 | 0.03 | 0.00 |
| PRKD2    | CL | 0.47 | 0.17 | 0.23 | 0.04 | 0.00 | 0.09 |
| PRPF31   | CL | 0.46 | 0.24 | 0.15 | 0.01 | 0.00 | 0.15 |
| PTPN14   | CL | 0.00 | 0.40 | 0.12 | 0.00 | 0.00 | 0.47 |
| PTPRA    | CL | 0.11 | 0.32 | 0.06 | 0.04 | 0.07 | 0.41 |
| QTRT1    | CL | 0.40 | 0.40 | 0.10 | 0.00 | 0.00 | 0.10 |
| RASGRP1  | CL | 0.07 | 0.25 | 0.05 | 0.00 | 0.00 | 0.64 |
| RBCK1    | CL | 0.38 | 0.27 | 0.13 | 0.16 | 0.01 | 0.06 |
| RBM42    | CL | 0.62 | 0.20 | 0.12 | 0.04 | 0.00 | 0.01 |
| RFX2     | CL | 0.00 | 0.49 | 0.39 | 0.00 | 0.00 | 0.12 |
| RFXANK   | CL | 0.43 | 0.31 | 0.14 | 0.07 | 0.00 | 0.05 |
| RGS12    | CL | 0.28 | 0.33 | 0.09 | 0.00 | 0.00 | 0.31 |
| RIN1     | CL | 0.00 | 0.31 | 0.12 | 0.12 | 0.00 | 0.45 |
| SARS2    | CL | 0.37 | 0.23 | 0.15 | 0.02 | 0.00 | 0.23 |
| SCAMP4   | CL | 0.28 | 0.27 | 0.18 | 0.09 | 0.19 | 0.00 |
| SEMA6A   | CL | 0.26 | 0.22 | 0.04 | 0.00 | 0.47 | 0.00 |
| SEMA6D   | CL | 0.21 | 0.24 | 0.05 | 0.00 | 0.26 | 0.23 |
| SHOX2    | CL | 0.03 | 0.21 | 0.76 | 0.00 | 0.00 | 0.00 |
| SIPA1L1  | CL | 0.00 | 0.30 | 0.28 | 0.00 | 0.00 | 0.42 |
| SLC12A4  | CL | 0.36 | 0.39 | 0.23 | 0.00 | 0.00 | 0.02 |
| SLC2A10  | CL | 0.10 | 0.30 | 0.46 | 0.07 | 0.00 | 0.06 |
| SLC4A4   | CL | 0.11 | 0.55 | 0.03 | 0.00 | 0.00 | 0.30 |
| SLC6A11  | CL | 0.16 | 0.38 | 0.01 | 0.00 | 0.00 | 0.45 |
| SLC6A9   | CL | 0.23 | 0.27 | 0.13 | 0.00 | 0.37 | 0.00 |
| SMO      | CL | 0.40 | 0.23 | 0.37 | 0.00 | 0.00 | 0.00 |
| SNTA1    | CL | 0.00 | 0.51 | 0.00 | 0.00 | 0.13 | 0.35 |
| SOCS2    | CL | 0.17 | 0.16 | 0.67 | 0.00 | 0.00 | 0.00 |
| SOX9     | CL | 0.30 | 0.37 | 0.23 | 0.00 | 0.00 | 0.09 |
| SPRY2    | CL | 0.56 | 0.01 | 0.12 | 0.11 | 0.00 | 0.21 |
| SSH3     | CL | 0.00 | 0.21 | 0.03 | 0.08 | 0.69 | 0.00 |
| TBX2     | CL | 0.48 | 0.17 | 0.24 | 0.00 | 0.00 | 0.11 |
| TEAD3    | CL | 0.32 | 0.28 | 0.25 | 0.07 | 0.00 | 0.08 |
| TGFB3    | CL | 0.22 | 0.23 | 0.06 | 0.00 | 0.50 | 0.00 |
| TGIF2    | CL | 0.37 | 0.39 | 0.24 | 0.00 | 0.00 | 0.00 |
| TLE2     | CL | 0.59 | 0.04 | 0.10 | 0.00 | 0.00 | 0.27 |
| TMED1    | CL | 0.33 | 0.27 | 0.09 | 0.22 | 0.00 | 0.08 |
| TMEM147  | CL | 0.40 | 0.26 | 0.09 | 0.12 | 0.00 | 0.13 |
| TMEM161A | CL | 0.43 | 0.23 | 0.11 | 0.07 | 0.00 | 0.16 |
| TRIB2    | CL | 0.91 | 0.00 | 0.05 | 0.00 | 0.00 | 0.04 |
| TRIP6    | CL | 0.11 | 0.43 | 0.38 | 0.07 | 0.01 | 0.00 |
| VAV3     | CL | 0.18 | 0.27 | 0.24 | 0.00 | 0.00 | 0.31 |
| VPS16    | CL | 0.45 | 0.26 | 0.08 | 0.08 | 0.00 | 0.13 |
| WSCD1    | CL | 0.90 | 0.00 | 0.10 | 0.00 | 0.00 | 0.00 |
| ZFHX4    | CL | 0.17 | 0.40 | 0.13 | 0.00 | 0.30 | 0.00 |
| ZNF134   | CL | 0.40 | 0.19 | 0.19 | 0.00 | 0.00 | 0.23 |
| ZNF20    | CL | 0.62 | 0.10 | 0.18 | 0.00 | 0.00 | 0.10 |
| ZNF211   | CL | 0.47 | 0.28 | 0.12 | 0.00 | 0.00 | 0.14 |
| ZNF227   | CL | 0.60 | 0.17 | 0.12 | 0.02 | 0.00 | 0.10 |
| ZNF235   | CL | 0.47 | 0.30 | 0.11 | 0.00 | 0.00 | 0.12 |
| ZNF264   | CL | 0.73 | 0.00 | 0.23 | 0.00 | 0.04 | 0.00 |
| ZNF304   | CL | 0.31 | 0.21 | 0.19 | 0.00 | 0.00 | 0.30 |
| ZNF419   | CL | 0.37 | 0.34 | 0.13 | 0.00 | 0.00 | 0.16 |
| ZNF446   | CL | 0.48 | 0.27 | 0.10 | 0.00 | 0.04 | 0.12 |
| ZNF45    | CL | 0.46 | 0.25 | 0.13 | 0.07 | 0.00 | 0.08 |
| ZNF606   | CL | 0.59 | 0.20 | 0.17 | 0.00 | 0.00 | 0.04 |
| ZNF671   | CL | 0.37 | 0.23 | 0.11 | 0.03 | 0.00 | 0.25 |
| ZNF8     | CL | 0.52 | 0.02 | 0.19 | 0.00 | 0.00 | 0.27 |
| ACPP     | MS | 0.24 | 0.15 | 0.40 | 0.07 | 0.10 | 0.04 |
| ACSL1    | MS | 0.00 | 0.00 | 0.00 | 0.42 | 0.58 | 0.00 |
| ADAM12   | MS | 0.08 | 0.00 | 0.43 | 0.50 | 0.00 | 0.00 |
| AIM1     | MS | 0.00 | 0.00 | 0.44 | 0.36 | 0.00 | 0.21 |

|          |    |      |      |      |      |      |      |
|----------|----|------|------|------|------|------|------|
| ALDH3B1  | MS | 0.00 | 0.15 | 0.26 | 0.51 | 0.08 | 0.00 |
| ALOX5    | MS | 0.00 | 0.08 | 0.03 | 0.80 | 0.08 | 0.00 |
| AMPD3    | MS | 0.00 | 0.26 | 0.03 | 0.16 | 0.55 | 0.00 |
| ANXA1    | MS | 0.00 | 0.00 | 0.98 | 0.00 | 0.00 | 0.02 |
| ANXA2    | MS | 0.00 | 0.00 | 0.74 | 0.26 | 0.00 | 0.00 |
| ANXA4    | MS | 0.00 | 0.18 | 0.28 | 0.14 | 0.31 | 0.09 |
| ARHGAP29 | MS | 0.00 | 0.00 | 0.27 | 0.28 | 0.00 | 0.45 |
| ARPC1B   | MS | 0.00 | 0.00 | 0.20 | 0.75 | 0.00 | 0.05 |
| ARSJ     | MS | 0.26 | 0.28 | 0.38 | 0.00 | 0.00 | 0.08 |
| ASL      | MS | 0.14 | 0.21 | 0.21 | 0.23 | 0.00 | 0.22 |
| BATF     | MS | 0.00 | 0.00 | 0.00 | 0.99 | 0.00 | 0.01 |
| BDKRB2   | MS | 0.00 | 0.00 | 0.57 | 0.00 | 0.17 | 0.25 |
| BLVRB    | MS | 0.00 | 0.17 | 0.15 | 0.41 | 0.00 | 0.27 |
| BNC2     | MS | 0.00 | 0.00 | 0.21 | 0.73 | 0.00 | 0.06 |
| C1orf38  | MS | 0.00 | 0.00 | 0.00 | 0.62 | 0.32 | 0.06 |
| C1orf54  | MS | 0.29 | 0.39 | 0.11 | 0.18 | 0.00 | 0.03 |
| C5AR1    | MS | 0.00 | 0.00 | 0.28 | 0.70 | 0.00 | 0.03 |
| CASP1    | MS | 0.06 | 0.20 | 0.30 | 0.44 | 0.00 | 0.00 |
| CASP4    | MS | 0.00 | 0.00 | 0.28 | 0.68 | 0.00 | 0.04 |
| CASP5    | MS | 0.00 | 0.02 | 0.38 | 0.59 | 0.00 | 0.01 |
| CASP8    | MS | 0.00 | 0.32 | 0.21 | 0.34 | 0.00 | 0.13 |
| CAST     | MS | 0.00 | 0.15 | 0.29 | 0.37 | 0.19 | 0.01 |
| CCDC109B | MS | 0.26 | 0.13 | 0.45 | 0.14 | 0.00 | 0.03 |
| CCR5     | MS | 0.00 | 0.00 | 0.29 | 0.71 | 0.00 | 0.01 |
| CD14     | MS | 0.00 | 0.00 | 0.13 | 0.87 | 0.00 | 0.00 |
| CD2AP    | MS | 0.00 | 0.00 | 0.65 | 0.18 | 0.00 | 0.17 |
| CD4      | MS | 0.00 | 0.02 | 0.04 | 0.85 | 0.00 | 0.08 |
| CDCP1    | MS | 0.19 | 0.00 | 0.25 | 0.55 | 0.00 | 0.01 |
| CEBPB    | MS | 0.02 | 0.00 | 0.15 | 0.66 | 0.00 | 0.17 |
| CHI3L1   | MS | 0.03 | 0.00 | 0.97 | 0.00 | 0.00 | 0.00 |
| CLCF1    | MS | 0.00 | 0.00 | 0.87 | 0.07 | 0.00 | 0.05 |
| CLEC2B   | MS | 0.14 | 0.00 | 0.15 | 0.63 | 0.00 | 0.07 |
| CNN2     | MS | 0.00 | 0.00 | 0.00 | 1.00 | 0.00 | 0.00 |
| COL1A1   | MS | 0.00 | 0.00 | 0.00 | 1.00 | 0.00 | 0.00 |
| COL1A2   | MS | 0.00 | 0.00 | 0.00 | 1.00 | 0.00 | 0.00 |
| COL5A1   | MS | 0.00 | 0.00 | 0.00 | 0.98 | 0.00 | 0.02 |
| COL8A2   | MS | 0.00 | 0.00 | 0.06 | 0.94 | 0.00 | 0.00 |
| COPZ2    | MS | 0.00 | 0.09 | 0.20 | 0.65 | 0.01 | 0.05 |
| CSTA     | MS | 0.00 | 0.00 | 0.45 | 0.55 | 0.00 | 0.00 |
| CTSB     | MS | 0.00 | 0.04 | 0.16 | 0.59 | 0.00 | 0.21 |
| CTSC     | MS | 0.00 | 0.00 | 0.04 | 0.96 | 0.00 | 0.00 |
| CTSZ     | MS | 0.00 | 0.00 | 0.08 | 0.80 | 0.00 | 0.12 |
| CYBRD1   | MS | 0.00 | 0.18 | 0.15 | 0.33 | 0.16 | 0.18 |
| DAB2     | MS | 0.00 | 0.00 | 0.04 | 0.91 | 0.00 | 0.05 |
| DCBLD2   | MS | 0.16 | 0.00 | 0.53 | 0.10 | 0.00 | 0.22 |
| DOK3     | MS | 0.01 | 0.03 | 0.30 | 0.54 | 0.00 | 0.13 |
| DSC2     | MS | 0.00 | 0.12 | 0.15 | 0.56 | 0.00 | 0.17 |
| DSE      | MS | 0.00 | 0.00 | 0.36 | 0.48 | 0.00 | 0.16 |
| EFEMP2   | MS | 0.18 | 0.19 | 0.22 | 0.25 | 0.00 | 0.16 |
| EHD2     | MS | 0.27 | 0.08 | 0.31 | 0.17 | 0.00 | 0.17 |
| ELF4     | MS | 0.11 | 0.00 | 0.10 | 0.79 | 0.00 | 0.00 |
| EMP3     | MS | 0.10 | 0.15 | 0.46 | 0.29 | 0.00 | 0.00 |
| ENG      | MS | 0.36 | 0.00 | 0.08 | 0.42 | 0.00 | 0.14 |
| FCGR2A   | MS | 0.00 | 0.00 | 0.17 | 0.83 | 0.00 | 0.00 |
| FCGR2B   | MS | 0.00 | 0.00 | 0.56 | 0.44 | 0.00 | 0.00 |
| FES      | MS | 0.00 | 0.13 | 0.12 | 0.54 | 0.00 | 0.20 |
| FHL2     | MS | 0.00 | 0.00 | 0.00 | 0.40 | 0.00 | 0.60 |
| FHOD1    | MS | 0.08 | 0.00 | 0.17 | 0.66 | 0.00 | 0.09 |
| FMNL1    | MS | 0.00 | 0.00 | 0.04 | 0.40 | 0.00 | 0.56 |
| FNDC3B   | MS | 0.32 | 0.01 | 0.28 | 0.28 | 0.00 | 0.11 |
| FOLR2    | MS | 0.00 | 0.00 | 0.00 | 0.96 | 0.00 | 0.04 |
| FURIN    | MS | 0.00 | 0.06 | 0.17 | 0.31 | 0.00 | 0.46 |
| FXYD5    | MS | 0.13 | 0.00 | 0.01 | 0.87 | 0.00 | 0.00 |

|         |    |      |      |      |      |      |      |
|---------|----|------|------|------|------|------|------|
| GCNT1   | MS | 0.00 | 0.00 | 0.60 | 0.00 | 0.00 | 0.40 |
| GLT25D1 | MS | 0.28 | 0.09 | 0.18 | 0.36 | 0.00 | 0.08 |
| GNA15   | MS | 0.00 | 0.00 | 0.04 | 0.69 | 0.00 | 0.27 |
| GRN     | MS | 0.14 | 0.16 | 0.19 | 0.46 | 0.00 | 0.05 |
| HEXA    | MS | 0.17 | 0.14 | 0.19 | 0.46 | 0.00 | 0.04 |
| HEXB    | MS | 0.13 | 0.00 | 0.20 | 0.48 | 0.00 | 0.19 |
| HFE     | MS | 0.00 | 0.10 | 0.33 | 0.30 | 0.08 | 0.18 |
| HK3     | MS | 0.00 | 0.00 | 0.10 | 0.81 | 0.00 | 0.09 |
| ICAM3   | MS | 0.12 | 0.10 | 0.03 | 0.53 | 0.00 | 0.23 |
| IFI30   | MS | 0.00 | 0.00 | 0.31 | 0.69 | 0.00 | 0.00 |
| IGFBP6  | MS | 0.44 | 0.00 | 0.10 | 0.17 | 0.00 | 0.29 |
| IL15RA  | MS | 0.08 | 0.00 | 0.34 | 0.43 | 0.00 | 0.15 |
| IL1R1   | MS | 0.00 | 0.00 | 0.00 | 0.91 | 0.00 | 0.09 |
| IL4R    | MS | 0.00 | 0.00 | 0.00 | 0.96 | 0.00 | 0.04 |
| IQGAP1  | MS | 0.00 | 0.17 | 0.22 | 0.22 | 0.39 | 0.00 |
| ITGA4   | MS | 0.35 | 0.00 | 0.51 | 0.03 | 0.00 | 0.10 |
| ITGA5   | MS | 0.37 | 0.00 | 0.18 | 0.45 | 0.00 | 0.00 |
| ITGAM   | MS | 0.00 | 0.10 | 0.04 | 0.64 | 0.13 | 0.09 |
| ITGB2   | MS | 0.00 | 0.11 | 0.12 | 0.74 | 0.00 | 0.03 |
| KYNU    | MS | 0.00 | 0.00 | 0.27 | 0.70 | 0.00 | 0.02 |
| LAIR1   | MS | 0.00 | 0.06 | 0.16 | 0.78 | 0.00 | 0.00 |
| LAMB1   | MS | 0.00 | 0.00 | 0.16 | 0.66 | 0.00 | 0.18 |
| LAPTM5  | MS | 0.00 | 0.11 | 0.08 | 0.81 | 0.00 | 0.00 |
| LCP1    | MS | 0.00 | 0.00 | 0.01 | 0.94 | 0.00 | 0.05 |
| LCP2    | MS | 0.00 | 0.00 | 0.18 | 0.68 | 0.00 | 0.13 |
| LGALS1  | MS | 0.13 | 0.12 | 0.07 | 0.52 | 0.00 | 0.15 |
| LGALS3  | MS | 0.07 | 0.04 | 0.38 | 0.29 | 0.00 | 0.21 |
| LHFPL2  | MS | 0.13 | 0.07 | 0.06 | 0.67 | 0.00 | 0.06 |
| LILRB2  | MS | 0.00 | 0.00 | 0.15 | 0.77 | 0.00 | 0.08 |
| LILRB3  | MS | 0.00 | 0.00 | 0.14 | 0.86 | 0.00 | 0.00 |
| LOX     | MS | 0.19 | 0.00 | 0.53 | 0.28 | 0.00 | 0.00 |
| LRRFIP1 | MS | 0.12 | 0.10 | 0.29 | 0.00 | 0.00 | 0.50 |
| LTBP1   | MS | 0.00 | 0.03 | 0.37 | 0.56 | 0.00 | 0.04 |
| LTBP2   | MS | 0.00 | 0.00 | 0.00 | 1.00 | 0.00 | 0.00 |
| LY75    | MS | 0.00 | 0.00 | 0.04 | 0.93 | 0.00 | 0.03 |
| LY96    | MS | 0.00 | 0.00 | 0.17 | 0.79 | 0.00 | 0.04 |
| MAFB    | MS | 0.00 | 0.00 | 0.09 | 0.79 | 0.00 | 0.12 |
| MAN1A1  | MS | 0.00 | 0.14 | 0.07 | 0.41 | 0.00 | 0.38 |
| MAN2A1  | MS | 0.00 | 0.25 | 0.07 | 0.00 | 0.68 | 0.00 |
| MAN2B1  | MS | 0.31 | 0.07 | 0.15 | 0.47 | 0.00 | 0.00 |
| MAPK13  | MS | 0.00 | 0.02 | 0.05 | 0.34 | 0.00 | 0.59 |
| MFSD1   | MS | 0.00 | 0.22 | 0.14 | 0.57 | 0.00 | 0.07 |
| MGAT1   | MS | 0.22 | 0.02 | 0.14 | 0.51 | 0.00 | 0.11 |
| MGST2   | MS | 0.00 | 0.26 | 0.05 | 0.60 | 0.00 | 0.08 |
| MRC2    | MS | 0.17 | 0.00 | 0.59 | 0.24 | 0.00 | 0.00 |
| MS4A4A  | MS | 0.00 | 0.00 | 0.06 | 0.94 | 0.00 | 0.00 |
| MSR1    | MS | 0.02 | 0.00 | 0.38 | 0.60 | 0.00 | 0.00 |
| MVP     | MS | 0.10 | 0.10 | 0.16 | 0.30 | 0.34 | 0.00 |
| MYH9    | MS | 0.00 | 0.12 | 0.09 | 0.79 | 0.00 | 0.00 |
| MYO1F   | MS | 0.02 | 0.10 | 0.06 | 0.81 | 0.00 | 0.00 |
| NCF2    | MS | 0.01 | 0.00 | 0.00 | 0.91 | 0.03 | 0.05 |
| NCF4    | MS | 0.00 | 0.00 | 0.00 | 0.98 | 0.00 | 0.02 |
| NOD2    | MS | 0.58 | 0.00 | 0.26 | 0.16 | 0.00 | 0.00 |
| NPC2    | MS | 0.05 | 0.12 | 0.15 | 0.65 | 0.02 | 0.00 |
| NRP1    | MS | 0.24 | 0.00 | 0.38 | 0.12 | 0.00 | 0.26 |
| P4HA2   | MS | 0.00 | 0.00 | 0.24 | 0.43 | 0.00 | 0.33 |
| PDPN    | MS | 0.13 | 0.16 | 0.72 | 0.00 | 0.00 | 0.00 |
| PHF11   | MS | 0.00 | 0.28 | 0.06 | 0.19 | 0.46 | 0.01 |
| PLAU    | MS | 0.00 | 0.00 | 0.15 | 0.85 | 0.00 | 0.00 |
| PLAUR   | MS | 0.00 | 0.00 | 0.26 | 0.74 | 0.00 | 0.00 |
| PLK3    | MS | 0.00 | 0.00 | 0.31 | 0.62 | 0.00 | 0.07 |
| PLS3    | MS | 0.00 | 0.09 | 0.21 | 0.11 | 0.53 | 0.06 |
| POLD4   | MS | 0.13 | 0.13 | 0.05 | 0.63 | 0.05 | 0.00 |

|           |    |      |      |      |      |      |      |
|-----------|----|------|------|------|------|------|------|
| PROCR     | MS | 0.09 | 0.00 | 0.11 | 0.80 | 0.00 | 0.00 |
| PTGER4    | MS | 0.00 | 0.08 | 0.16 | 0.77 | 0.00 | 0.00 |
| PTPN22    | MS | 0.00 | 0.00 | 0.21 | 0.67 | 0.00 | 0.12 |
| PTPN6     | MS | 0.00 | 0.00 | 0.00 | 0.98 | 0.01 | 0.01 |
| PTPRC     | MS | 0.00 | 0.00 | 0.13 | 0.74 | 0.00 | 0.14 |
| PTRF      | MS | 0.00 | 0.00 | 0.30 | 0.49 | 0.20 | 0.00 |
| PYGL      | MS | 0.37 | 0.00 | 0.48 | 0.15 | 0.00 | 0.00 |
| RAB11FIP1 | MS | 0.00 | 0.19 | 0.00 | 0.41 | 0.00 | 0.40 |
| RAB27A    | MS | 0.00 | 0.00 | 0.24 | 0.67 | 0.00 | 0.09 |
| RAB32     | MS | 0.05 | 0.25 | 0.18 | 0.51 | 0.00 | 0.02 |
| RABGAP1L  | MS | 0.00 | 0.16 | 0.00 | 0.18 | 0.05 | 0.61 |
| RAC2      | MS | 0.00 | 0.00 | 0.04 | 0.88 | 0.00 | 0.08 |
| RBKS      | MS | 0.00 | 0.21 | 0.08 | 0.17 | 0.19 | 0.35 |
| RBMS1     | MS | 0.18 | 0.00 | 0.20 | 0.43 | 0.00 | 0.20 |
| RELB      | MS | 0.27 | 0.00 | 0.19 | 0.41 | 0.00 | 0.13 |
| RHOG      | MS | 0.07 | 0.13 | 0.04 | 0.19 | 0.58 | 0.01 |
| RRAS      | MS | 0.00 | 0.05 | 0.26 | 0.70 | 0.00 | 0.00 |
| RUNX2     | MS | 0.00 | 0.00 | 0.00 | 0.81 | 0.02 | 0.17 |
| S100A11   | MS | 0.04 | 0.00 | 0.12 | 0.85 | 0.00 | 0.00 |
| S100A13   | MS | 0.00 | 0.45 | 0.12 | 0.06 | 0.19 | 0.18 |
| S100A4    | MS | 0.00 | 0.00 | 0.14 | 0.86 | 0.00 | 0.00 |
| SAT1      | MS | 0.17 | 0.00 | 0.12 | 0.57 | 0.00 | 0.14 |
| SCPEP1    | MS | 0.00 | 0.14 | 0.07 | 0.58 | 0.00 | 0.22 |
| SEC24D    | MS | 0.21 | 0.00 | 0.18 | 0.41 | 0.00 | 0.20 |
| SERPINA1  | MS | 0.05 | 0.00 | 0.29 | 0.66 | 0.00 | 0.00 |
| SERPINE1  | MS | 0.00 | 0.00 | 0.22 | 0.78 | 0.00 | 0.00 |
| SFT2D2    | MS | 0.00 | 0.00 | 0.37 | 0.55 | 0.08 | 0.00 |
| SH2B3     | MS | 0.17 | 0.00 | 0.10 | 0.57 | 0.00 | 0.15 |
| SHC1      | MS | 0.12 | 0.00 | 0.29 | 0.44 | 0.00 | 0.15 |
| SIGLEC7   | MS | 0.00 | 0.00 | 0.27 | 0.73 | 0.00 | 0.00 |
| SIGLEC9   | MS | 0.00 | 0.00 | 0.11 | 0.89 | 0.00 | 0.00 |
| SLAMF8    | MS | 0.00 | 0.00 | 0.20 | 0.79 | 0.00 | 0.01 |
| SLC10A3   | MS | 0.12 | 0.00 | 0.32 | 0.39 | 0.01 | 0.16 |
| SLC11A1   | MS | 0.00 | 0.00 | 0.06 | 0.94 | 0.00 | 0.00 |
| SLC16A3   | MS | 0.23 | 0.00 | 0.31 | 0.46 | 0.00 | 0.00 |
| SP100     | MS | 0.13 | 0.02 | 0.20 | 0.60 | 0.00 | 0.05 |
| SQRDL     | MS | 0.00 | 0.00 | 0.17 | 0.76 | 0.00 | 0.07 |
| SRPX2     | MS | 0.00 | 0.00 | 0.43 | 0.57 | 0.00 | 0.00 |
| ST14      | MS | 0.18 | 0.00 | 0.37 | 0.45 | 0.00 | 0.00 |
| STAB1     | MS | 0.00 | 0.01 | 0.14 | 0.86 | 0.00 | 0.00 |
| STAT6     | MS | 0.00 | 0.14 | 0.00 | 0.50 | 0.00 | 0.36 |
| STXBP2    | MS | 0.07 | 0.15 | 0.00 | 0.77 | 0.00 | 0.02 |
| SWAP70    | MS | 0.00 | 0.00 | 0.26 | 0.62 | 0.08 | 0.04 |
| SYNGR2    | MS | 0.07 | 0.09 | 0.01 | 0.27 | 0.55 | 0.00 |
| SYPL1     | MS | 0.05 | 0.24 | 0.24 | 0.00 | 0.46 | 0.00 |
| TCIRG1    | MS | 0.00 | 0.00 | 0.12 | 0.86 | 0.00 | 0.02 |
| TEC       | MS | 0.00 | 0.00 | 0.05 | 0.61 | 0.00 | 0.33 |
| TES       | MS | 0.23 | 0.00 | 0.19 | 0.49 | 0.00 | 0.10 |
| TGFBI     | MS | 0.00 | 0.00 | 0.34 | 0.66 | 0.00 | 0.00 |
| TGFBR2    | MS | 0.00 | 0.00 | 0.01 | 0.89 | 0.00 | 0.09 |
| TGOLN2    | MS | 0.00 | 0.17 | 0.18 | 0.17 | 0.24 | 0.24 |
| THBD      | MS | 0.00 | 0.00 | 0.30 | 0.62 | 0.00 | 0.08 |
| THBS1     | MS | 0.00 | 0.00 | 0.09 | 0.87 | 0.00 | 0.04 |
| TIMP1     | MS | 0.08 | 0.00 | 0.21 | 0.70 | 0.00 | 0.00 |
| TLR2      | MS | 0.00 | 0.12 | 0.06 | 0.81 | 0.00 | 0.01 |
| TLR4      | MS | 0.00 | 0.36 | 0.15 | 0.22 | 0.15 | 0.13 |
| TMBIM1    | MS | 0.00 | 0.21 | 0.14 | 0.23 | 0.40 | 0.03 |
| TNFAIP3   | MS | 0.10 | 0.00 | 0.07 | 0.77 | 0.00 | 0.06 |
| TNFAIP8   | MS | 0.00 | 0.00 | 0.35 | 0.53 | 0.00 | 0.11 |
| TNFRSF11A | MS | 0.00 | 0.00 | 0.25 | 0.24 | 0.00 | 0.50 |
| TNFRSF1A  | MS | 0.22 | 0.12 | 0.36 | 0.24 | 0.00 | 0.06 |
| TNFRSF1B  | MS | 0.05 | 0.00 | 0.09 | 0.78 | 0.00 | 0.07 |
| TRADD     | MS | 0.15 | 0.14 | 0.12 | 0.18 | 0.36 | 0.05 |

|           |    |      |      |      |      |      |      |
|-----------|----|------|------|------|------|------|------|
| TRIM22    | MS | 0.01 | 0.40 | 0.27 | 0.29 | 0.00 | 0.03 |
| TRIM38    | MS | 0.00 | 0.08 | 0.00 | 0.92 | 0.00 | 0.00 |
| TRPM2     | MS | 0.00 | 0.13 | 0.00 | 0.30 | 0.00 | 0.57 |
| UAP1      | MS | 0.27 | 0.06 | 0.20 | 0.22 | 0.00 | 0.25 |
| UCP2      | MS | 0.26 | 0.09 | 0.06 | 0.59 | 0.00 | 0.00 |
| VAMP5     | MS | 0.13 | 0.18 | 0.10 | 0.51 | 0.00 | 0.07 |
| VDR       | MS | 0.00 | 0.00 | 0.23 | 0.71 | 0.00 | 0.06 |
| WIPF1     | MS | 0.08 | 0.05 | 0.09 | 0.25 | 0.53 | 0.00 |
| WWTR1     | MS | 0.22 | 0.15 | 0.22 | 0.40 | 0.00 | 0.00 |
| YAP1      | MS | 0.00 | 0.44 | 0.39 | 0.00 | 0.00 | 0.17 |
| ZNF217    | MS | 0.03 | 0.00 | 0.48 | 0.49 | 0.00 | 0.00 |
| ACSL4     | NL | 0.00 | 0.00 | 0.06 | 0.11 | 0.24 | 0.60 |
| ACYP2     | NL | 0.01 | 0.31 | 0.00 | 0.00 | 0.45 | 0.23 |
| ADD3      | NL | 0.00 | 0.46 | 0.00 | 0.00 | 0.39 | 0.15 |
| AGTPBP1   | NL | 0.00 | 0.00 | 0.01 | 0.00 | 0.75 | 0.24 |
| AGXT2L1   | NL | 0.06 | 0.39 | 0.00 | 0.00 | 0.19 | 0.35 |
| AKR7A3    | NL | 0.01 | 0.51 | 0.13 | 0.00 | 0.14 | 0.21 |
| ANKRD46   | NL | 0.00 | 0.15 | 0.04 | 0.00 | 0.00 | 0.80 |
| ANKS1B    | NL | 0.00 | 0.15 | 0.00 | 0.00 | 0.56 | 0.29 |
| ANXA3     | NL | 0.00 | 0.26 | 0.00 | 0.00 | 0.24 | 0.51 |
| ANXA7     | NL | 0.00 | 0.32 | 0.00 | 0.06 | 0.24 | 0.38 |
| ARRB1     | NL | 0.00 | 0.25 | 0.00 | 0.09 | 0.19 | 0.47 |
| ATP5F1    | NL | 0.31 | 0.25 | 0.11 | 0.06 | 0.00 | 0.26 |
| ATP5L     | NL | 0.35 | 0.12 | 0.07 | 0.17 | 0.00 | 0.29 |
| ATRNL1    | NL | 0.00 | 0.03 | 0.04 | 0.00 | 0.00 | 0.92 |
| BASP1     | NL | 0.12 | 0.01 | 0.00 | 0.00 | 0.00 | 0.86 |
| BCAS1     | NL | 0.18 | 0.00 | 0.00 | 0.03 | 0.78 | 0.01 |
| BEST1     | NL | 0.00 | 0.25 | 0.00 | 0.18 | 0.57 | 0.00 |
| CA4       | NL | 0.00 | 0.13 | 0.00 | 0.00 | 0.00 | 0.87 |
| CALM2     | NL | 0.00 | 0.08 | 0.00 | 0.00 | 0.52 | 0.40 |
| CAMK2G    | NL | 0.00 | 0.26 | 0.00 | 0.00 | 0.00 | 0.74 |
| CASQ1     | NL | 0.14 | 0.17 | 0.04 | 0.00 | 0.00 | 0.65 |
| CCDC121   | NL | 0.00 | 0.35 | 0.20 | 0.00 | 0.45 | 0.00 |
| CCK       | NL | 0.00 | 0.13 | 0.00 | 0.00 | 0.00 | 0.87 |
| CDC42     | NL | 0.33 | 0.00 | 0.18 | 0.26 | 0.04 | 0.19 |
| CDR1      | NL | 0.02 | 0.00 | 0.00 | 0.00 | 0.56 | 0.43 |
| CHN1      | NL | 0.00 | 0.08 | 0.00 | 0.00 | 0.00 | 0.92 |
| CLCA4     | NL | 0.00 | 0.23 | 0.00 | 0.00 | 0.77 | 0.00 |
| COX5B     | NL | 0.16 | 0.24 | 0.00 | 0.02 | 0.08 | 0.50 |
| CPNE6     | NL | 0.00 | 0.32 | 0.00 | 0.00 | 0.08 | 0.60 |
| CRBN      | NL | 0.00 | 0.21 | 0.04 | 0.00 | 0.19 | 0.56 |
| CRYL1     | NL | 0.00 | 0.35 | 0.01 | 0.10 | 0.45 | 0.09 |
| CRYM      | NL | 0.00 | 0.05 | 0.00 | 0.00 | 0.00 | 0.94 |
| CRYZL1    | NL | 0.00 | 0.19 | 0.06 | 0.00 | 0.28 | 0.47 |
| CUTC      | NL | 0.08 | 0.22 | 0.00 | 0.01 | 0.69 | 0.00 |
| DHRS9     | NL | 0.00 | 0.11 | 0.00 | 0.36 | 0.50 | 0.03 |
| DYNC111   | NL | 0.00 | 0.19 | 0.00 | 0.00 | 0.07 | 0.74 |
| EDIL3     | NL | 0.00 | 0.10 | 0.00 | 0.00 | 0.83 | 0.06 |
| ENPP4     | NL | 0.00 | 0.18 | 0.00 | 0.00 | 0.72 | 0.11 |
| EPB41L3   | NL | 0.00 | 0.05 | 0.00 | 0.00 | 0.55 | 0.41 |
| EVI2A     | NL | 0.02 | 0.02 | 0.00 | 0.07 | 0.89 | 0.00 |
| FAM49B    | NL | 0.16 | 0.00 | 0.07 | 0.33 | 0.07 | 0.37 |
| FBXO3     | NL | 0.00 | 0.35 | 0.11 | 0.00 | 0.00 | 0.55 |
| FEZF2     | NL | 0.00 | 0.20 | 0.00 | 0.00 | 0.17 | 0.62 |
| FHIT      | NL | 0.13 | 0.00 | 0.00 | 0.22 | 0.65 | 0.00 |
| FUT9      | NL | 0.48 | 0.05 | 0.00 | 0.00 | 0.00 | 0.47 |
| FXD1      | NL | 0.00 | 0.33 | 0.00 | 0.00 | 0.25 | 0.41 |
| GABARAPL2 | NL | 0.10 | 0.32 | 0.00 | 0.00 | 0.40 | 0.19 |
| GABRB2    | NL | 0.00 | 0.00 | 0.00 | 0.00 | 0.00 | 1.00 |
| GNAI1     | NL | 0.13 | 0.00 | 0.01 | 0.00 | 0.70 | 0.16 |
| GPR22     | NL | 0.00 | 0.11 | 0.00 | 0.00 | 0.00 | 0.89 |
| GRM1      | NL | 0.00 | 0.24 | 0.00 | 0.00 | 0.00 | 0.76 |
| GRM3      | NL | 0.00 | 0.04 | 0.00 | 0.01 | 0.66 | 0.29 |

|          |    |      |      |      |      |      |      |
|----------|----|------|------|------|------|------|------|
| GUK1     | NL | 0.10 | 0.23 | 0.00 | 0.00 | 0.21 | 0.46 |
| HPCA     | NL | 0.00 | 0.04 | 0.01 | 0.00 | 0.00 | 0.96 |
| HPCAL4   | NL | 0.00 | 0.20 | 0.00 | 0.00 | 0.00 | 0.80 |
| HPRT1    | NL | 0.00 | 0.02 | 0.04 | 0.00 | 0.00 | 0.94 |
| IMPA1    | NL | 0.00 | 0.32 | 0.34 | 0.00 | 0.04 | 0.30 |
| KCNJ3    | NL | 0.00 | 0.08 | 0.00 | 0.00 | 0.00 | 0.92 |
| KCNK1    | NL | 0.00 | 0.30 | 0.00 | 0.00 | 0.08 | 0.62 |
| KIAA1598 | NL | 0.00 | 0.01 | 0.00 | 0.00 | 0.98 | 0.01 |
| LYRM1    | NL | 0.13 | 0.13 | 0.14 | 0.00 | 0.16 | 0.43 |
| MAGEH1   | NL | 0.39 | 0.02 | 0.00 | 0.07 | 0.18 | 0.33 |
| MAT2B    | NL | 0.00 | 0.00 | 0.10 | 0.15 | 0.00 | 0.75 |
| MBP      | NL | 0.03 | 0.00 | 0.00 | 0.06 | 0.91 | 0.00 |
| MDH1     | NL | 0.00 | 0.09 | 0.00 | 0.00 | 0.00 | 0.91 |
| MMD      | NL | 0.22 | 0.00 | 0.01 | 0.23 | 0.01 | 0.52 |
| MORF4L2  | NL | 0.19 | 0.00 | 0.13 | 0.03 | 0.00 | 0.65 |
| MRPL49   | NL | 0.24 | 0.26 | 0.20 | 0.01 | 0.00 | 0.28 |
| MSRB2    | NL | 0.00 | 0.16 | 0.01 | 0.17 | 0.32 | 0.34 |
| MYBPC1   | NL | 0.00 | 0.61 | 0.00 | 0.04 | 0.19 | 0.16 |
| NANOS1   | NL | 0.69 | 0.00 | 0.07 | 0.00 | 0.00 | 0.23 |
| NDRG2    | NL | 0.00 | 0.24 | 0.00 | 0.00 | 0.46 | 0.30 |
| NDUFS3   | NL | 0.34 | 0.20 | 0.05 | 0.09 | 0.00 | 0.33 |
| NSL1     | NL | 0.44 | 0.21 | 0.04 | 0.09 | 0.21 | 0.00 |
| NTSR2    | NL | 0.00 | 0.40 | 0.00 | 0.00 | 0.27 | 0.34 |
| PARP8    | NL | 0.21 | 0.10 | 0.11 | 0.27 | 0.00 | 0.31 |
| PDE6D    | NL | 0.58 | 0.09 | 0.03 | 0.11 | 0.05 | 0.16 |
| PEX11B   | NL | 0.29 | 0.17 | 0.01 | 0.00 | 0.00 | 0.52 |
| PEX19    | NL | 0.00 | 0.41 | 0.00 | 0.16 | 0.10 | 0.32 |
| PGBD5    | NL | 0.00 | 0.13 | 0.00 | 0.00 | 0.06 | 0.81 |
| POPDC3   | NL | 0.00 | 0.00 | 0.00 | 0.12 | 0.48 | 0.40 |
| PPA1     | NL | 0.00 | 0.01 | 0.00 | 0.00 | 0.46 | 0.52 |
| PPFIA2   | NL | 0.00 | 0.00 | 0.00 | 0.00 | 0.51 | 0.49 |
| PPP1R1A  | NL | 0.00 | 0.35 | 0.00 | 0.00 | 0.25 | 0.40 |
| PPP2R5A  | NL | 0.24 | 0.37 | 0.00 | 0.00 | 0.29 | 0.10 |
| PRPSAP2  | NL | 0.43 | 0.19 | 0.07 | 0.07 | 0.24 | 0.00 |
| REPS2    | NL | 0.00 | 0.10 | 0.00 | 0.00 | 0.27 | 0.63 |
| RND1     | NL | 0.10 | 0.11 | 0.00 | 0.00 | 0.00 | 0.78 |
| ROGDI    | NL | 0.00 | 0.03 | 0.00 | 0.02 | 0.75 | 0.20 |
| SAR1A    | NL | 0.60 | 0.00 | 0.00 | 0.35 | 0.00 | 0.04 |
| SCHIP1   | NL | 0.22 | 0.24 | 0.00 | 0.00 | 0.36 | 0.18 |
| SEPP1    | NL | 0.00 | 0.24 | 0.00 | 0.21 | 0.55 | 0.00 |
| SEPW1    | NL | 0.18 | 0.10 | 0.00 | 0.06 | 0.39 | 0.27 |
| SERPINI1 | NL | 0.00 | 0.08 | 0.00 | 0.04 | 0.24 | 0.64 |
| SGK3     | NL | 0.00 | 0.16 | 0.12 | 0.00 | 0.73 | 0.00 |
| SH3GL2   | NL | 0.00 | 0.10 | 0.00 | 0.00 | 0.00 | 0.90 |
| SH3GL3   | NL | 0.00 | 0.04 | 0.00 | 0.00 | 0.78 | 0.18 |
| SIRT5    | NL | 0.00 | 0.29 | 0.02 | 0.00 | 0.00 | 0.69 |
| SLC16A7  | NL | 0.14 | 0.00 | 0.00 | 0.45 | 0.00 | 0.40 |
| SLC30A10 | NL | 0.00 | 0.24 | 0.00 | 0.00 | 0.00 | 0.76 |
| SLC31A2  | NL | 0.00 | 0.07 | 0.00 | 0.14 | 0.79 | 0.00 |
| SLCO1A2  | NL | 0.00 | 0.08 | 0.00 | 0.00 | 0.87 | 0.06 |
| SNCG     | NL | 0.00 | 0.23 | 0.00 | 0.00 | 0.00 | 0.77 |
| SNX11    | NL | 0.16 | 0.17 | 0.00 | 0.49 | 0.06 | 0.11 |
| SPAST    | NL | 0.48 | 0.09 | 0.00 | 0.00 | 0.41 | 0.02 |
| TCEAL1   | NL | 0.01 | 0.26 | 0.06 | 0.00 | 0.00 | 0.66 |
| TCEAL2   | NL | 0.17 | 0.05 | 0.00 | 0.00 | 0.00 | 0.78 |
| THTPA    | NL | 0.34 | 0.26 | 0.00 | 0.05 | 0.03 | 0.33 |
| TMEM144  | NL | 0.00 | 0.18 | 0.00 | 0.02 | 0.80 | 0.00 |
| TPM3     | NL | 0.05 | 0.00 | 0.19 | 0.32 | 0.00 | 0.44 |
| TSNAX    | NL | 0.00 | 0.33 | 0.03 | 0.19 | 0.00 | 0.45 |
| TTC1     | NL | 0.18 | 0.06 | 0.03 | 0.17 | 0.15 | 0.41 |
| TTPA     | NL | 0.00 | 0.58 | 0.02 | 0.00 | 0.00 | 0.40 |
| UGT8     | NL | 0.09 | 0.06 | 0.00 | 0.10 | 0.75 | 0.00 |
| UROS     | NL | 0.00 | 0.13 | 0.00 | 0.04 | 0.16 | 0.67 |



|        |    |      |      |      |      |      |      |
|--------|----|------|------|------|------|------|------|
| USP33  | NL | 0.00 | 0.06 | 0.18 | 0.00 | 0.00 | 0.76 |
| VIP    | NL | 0.00 | 0.10 | 0.00 | 0.00 | 0.00 | 0.90 |
| VSX1   | NL | 0.00 | 0.00 | 0.00 | 0.06 | 0.51 | 0.42 |
| YPEL5  | NL | 0.00 | 0.10 | 0.05 | 0.12 | 0.00 | 0.74 |
| ZNF323 | NL | 0.00 | 0.46 | 0.01 | 0.00 | 0.00 | 0.54 |

Table S4. We list the Verhaak Classifier Genes along with their fractional expression level in each of 6 cell types, as predicted by deconvolution of the RNA-seq data from NE glioma and nonneoplastic brain (NB) samples.

| HISTO ID# | MRI REGION | NECROSIS | MVP | MITO |
|-----------|------------|----------|-----|------|
| 1         | CE         | 1        | 0   | 1    |
| 2         | CE         | 1        | 0   | 1    |
| 3         | CE         | 0        | 0   | 0    |
| 4         | CE         | 1        | 0   | 0    |
| 5         | CE         | 0        | 0   | 1    |
| 6         | CE         | 1        | 0   | 0    |
| 7         | CE         | 1        | 1   | 1    |
| 8         | CE         | 1        | 0   | 0    |
| 9         | CE         | 1        | 0   | 0    |
| 10        | CE         | 1        | 1   | 1    |
| 11        | CE         | 0        | 0   | 1    |
| 12        | CE         | 0        | 0   | 1    |
| 13        | CE         | 0        | 1   | 1    |
| 14        | CE         | 0        | 0   | 0    |
| 15        | CE         | 0        | 1   | 1    |
| 16        | CE         | 0        | 0   | 0    |
| 17        | CE         | 1        | 0   | 0    |
| 18        | CE         | 0        | 0   | 0    |
| 19        | CE         | 0        | 0   | 0    |
| 20        | CE         | 0        | 0   | 0    |
| 21        | CE         | 0        | 0   | 0    |
| 22        | CE         | 1        | 0   | 0    |
| 23        | CE         | 1        | 0   | 0    |
| 24        | CE         | 1        | 0   | 0    |
| 25        | CE         | 1        | 0   | 1    |
| 26        | CE         | 1        | 1   | 1    |
| 27        | CE         | 0        | 1   | 1    |
| 28        | CE         | 1        | 0   | 1    |
| 29        | CE         | 1        | 1   | 1    |
| 30        | CE         | 1        | 0   | 1    |
| 31        | CE         | 0        | 1   | 1    |
| 32        | CE         | 0        | 0   | 0    |
| 33        | CE         | 0        | 1   | 1    |
| 34        | CE         | 0        | 1   | 1    |
| 35        | CE         | 0        | 1   | 1    |
| 36        | CE         | 0        | 0   | 1    |
| 37        | CE         | 1        | 0   | 1    |
| 38        | CE         | 1        | 0   | 1    |
| 39        | CE         | 0        | 0   | 1    |
| 40        | CE         | 1        | 0   | 0    |
| 41        | CE         | 0        | 0   | 0    |
| 42        | CE         | 0        | 1   | 1    |
| 43        | CE         | 0        | 1   | 1    |
| 44        | CE         | 0        | 0   | 1    |
| 45        | CE         | 1        | 0   | 1    |
| 46        | CE         | 1        | 1   | 1    |
| 47        | CE         | 1        | 1   | 1    |
| 48        | CE         | 1        | 0   | 0    |
| 49        | CE         | 0        | 0   | 0    |
| 50        | CE         | 1        | 1   | 1    |
| 51        | CE         | 1        | 1   | 1    |
| 52        | CE         | 0        | 1   | 1    |
| 53        | CE         | 1        | 0   | 0    |
| 54        | CE         | 1        | 1   | 1    |

|     |    |   |   |   |
|-----|----|---|---|---|
| 55  | CE | 1 | 1 | 1 |
| 56  | CE | 1 | 0 | 0 |
| 57  | CE | 1 | 1 | 1 |
| 58  | CE | 1 | 0 | 0 |
| 59  | CE | 0 | 1 | 1 |
| 60  | CE | 0 | 1 | 1 |
| 61  | CE | 1 | 1 | 1 |
| 62  | CE | 0 | 1 | 1 |
| 63  | CE | 1 | 1 | 1 |
| 64  | CE | 1 | 0 | 0 |
| 65  | CE | 0 | 0 | 0 |
| 66  | CE | 0 | 1 | 1 |
| 67  | CE | 1 | 1 | 1 |
| 68  | CE | 1 | 0 | 0 |
| 69  | CE | 1 | 0 | 1 |
| 70  | CE | 1 | 0 | 1 |
| 71  | CE | 1 | 0 | 0 |
| 72  | CE | 0 | 1 | 1 |
| 73  | CE | 1 | 0 | 0 |
| 74  | CE | 1 | 0 | 0 |
| 75  | CE | 1 | 0 | 0 |
| 76  | CE | 1 | 1 | 1 |
| 77  | CE | 1 | 1 | 1 |
| 78  | CE | 0 | 0 | 0 |
| 79  | CE | 0 | 0 | 0 |
| 80  | CE | 1 | 0 | 1 |
| 81  | CE | 1 | 1 | 1 |
| 82  | CE | 0 | 1 | 1 |
| 83  | CE | 1 | 1 | 1 |
| 84  | CE | 1 | 1 | 1 |
| 85  | CE | 1 | 1 | 1 |
| 86  | CE | 1 | 0 | 0 |
| 87  | CE | 1 | 1 | 1 |
| 88  | CE | 0 | 1 | 1 |
| 89  | CE | 1 | 0 | 0 |
| 90  | CE | 1 | 1 | 1 |
| 91  | CE | 0 | 0 | 0 |
| 92  | CE | 1 | 1 | 1 |
| 93  | CE | 1 | 1 | 1 |
| 94  | CE | 1 | 1 | 1 |
| 95  | CE | 1 | 1 | 1 |
| 96  | CE | 1 | 1 | 1 |
| 97  | CE | 0 | 0 | 1 |
| 98  | CE | 0 | 1 | 1 |
| 99  | CE | 1 | 1 | 1 |
| 100 | CE | 1 | 0 | 0 |
| 101 | CE | 1 | 0 | 0 |
| 102 | CE | 1 | 1 | 1 |
| 103 | CE | 1 | 1 | 1 |
| 104 | CE | 1 | 1 | 1 |
| 105 | CE | 1 | 1 | 1 |
| 106 | NE | 0 | 0 | 0 |
| 107 | NE | 0 | 0 | 0 |
| 108 | NE | 0 | 0 | 0 |
| 109 | NE | 0 | 0 | 0 |
| 110 | NE | 0 | 0 | 0 |

|     |    |   |   |   |
|-----|----|---|---|---|
| 111 | NE | 0 | 0 | 0 |
| 112 | NE | 0 | 0 | 1 |
| 113 | NE | 0 | 0 | 0 |
| 114 | NE | 0 | 0 | 0 |
| 115 | NE | 0 | 0 | 1 |
| 116 | NE | 0 | 0 | 0 |
| 117 | NE | 0 | 0 | 0 |
| 118 | NE | 0 | 0 | 0 |
| 119 | NE | 0 | 1 | 1 |
| 120 | NE | 0 | 0 | 0 |
| 121 | NE | 0 | 0 | 0 |
| 122 | NE | 0 | 0 | 0 |
| 123 | NE | 1 | 1 | 1 |
| 124 | NE | 0 | 0 | 0 |
| 125 | NE | 0 | 0 | 0 |
| 126 | NE | 0 | 0 | 0 |
| 127 | NE | 0 | 0 | 0 |
| 128 | NE | 0 | 0 | 0 |
| 129 | NE | 0 | 0 | 0 |
| 130 | NE | 0 | 0 | 0 |
| 131 | NE | 0 | 0 | 0 |
| 132 | NE | 0 | 0 | 1 |
| 133 | NE | 0 | 0 | 0 |
| 134 | NE | 0 | 0 | 0 |
| 135 | NE | 0 | 0 | 1 |
| 136 | NE | 0 | 0 | 0 |
| 137 | NE | 1 | 0 | 0 |
| 138 | NE | 0 | 0 | 1 |
| 139 | NE | 0 | 0 | 0 |
| 140 | NE | 0 | 0 | 0 |
| 141 | NE | 1 | 1 | 1 |
| 142 | NE | 0 | 0 | 0 |
| 143 | NE | 0 | 0 | 0 |
| 144 | NE | 0 | 0 | 0 |
| 145 | NE | 0 | 0 | 1 |
| 146 | NE | 0 | 1 | 1 |
| 147 | NE | 0 | 1 | 1 |
| 148 | NE | 0 | 0 | 0 |
| 149 | NE | 0 | 0 | 0 |
| 150 | NE | 0 | 0 | 1 |
| 151 | NE | 0 | 1 | 1 |
| 152 | NE | 0 | 0 | 0 |
| 153 | NE | 0 | 0 | 0 |
| 154 | NE | 0 | 0 | 1 |
| 155 | NE | 0 | 0 | 0 |
| 156 | NE | 0 | 0 | 1 |
| 157 | NE | 0 | 0 | 0 |
| 158 | NE | 0 | 0 | 0 |
| 159 | NE | 1 | 1 | 1 |
| 160 | NE | 1 | 0 | 0 |
| 161 | NE | 1 | 0 | 1 |
| 162 | NE | 0 | 0 | 0 |
| 163 | NE | 0 | 0 | 0 |
| 164 | NE | 0 | 0 | 0 |
| 165 | NE | 0 | 0 | 1 |
| 166 | NE | 0 | 1 | 1 |

|     |    |   |   |   |
|-----|----|---|---|---|
| 167 | NE | 0 | 0 | 0 |
| 168 | NE | 0 | 0 | 1 |
| 169 | NE | 0 | 1 | 1 |
| 170 | NE | 0 | 0 | 0 |
| 171 | NE | 0 | 0 | 1 |
| 172 | NE | 0 | 0 | 0 |
| 173 | NE | 0 | 0 | 0 |
| 174 | NE | 0 | 0 | 0 |
| 175 | NE | 1 | 0 | 0 |
| 176 | NE | 0 | 0 | 1 |
| 177 | NE | 0 | 0 | 0 |
| 178 | NE | 1 | 0 | 0 |
| 179 | NE | 0 | 0 | 0 |
| 180 | NE | 0 | 0 | 0 |
| 181 | NE | 0 | 0 | 1 |
| 182 | NE | 0 | 0 | 1 |
| 183 | NE | 0 | 0 | 0 |
| 184 | NE | 0 | 0 | 0 |
| 185 | NE | 0 | 0 | 0 |
| 186 | NE | 0 | 0 | 0 |
| 187 | NE | 0 | 0 | 0 |
| 188 | NE | 0 | 0 | 1 |
| 189 | NE | 0 | 0 | 0 |
| 190 | NE | 0 | 0 | 0 |
| 191 | NE | 0 | 0 | 0 |

Table S5. The histological features of GBM tabulated for each glioma specimen in this study.
